# Supplementary material for: Cross-sectional study to assess depression among healthcare workers in Lusaka, Zambia during the COVID-19 pandemic
Source: PubMed Central journal article supplement (PMC10083529; doi:10.1136/bmjopen-2022-069257), 2023-04-05
Supplement: bmjopen-2022-069257.draft_revisions.pdf [file bmjopen-2022-069257.draft_revisions.pdf]

# BMJ Open

BMJ Open is committed to open peer review. As part of this commitment we make the peer review history of every article we publish publicly available.

When an article is published we post the peer reviewers' comments and the authors' responses online. We also post the versions of the paper that were used during peer review. These are the versions that the peer review comments apply to.

The versions of the paper that follow are the versions that were submitted during the peer review process. They are not the versions of record or the final published versions. They should not be cited or distributed as the published version of this manuscript.

BMJ Open is an open access journal and the full, final, typeset and author-corrected version of record of the manuscript is available on our site with no access controls, subscription charges or pay-per-view fees (<http://bmjopen.bmj.com>).

If you have any questions on BMJ Open's open peer review process please email [info.bmjopen@bmj.com](mailto:info.bmjopen@bmj.com)

# BMJ Open

## Mental Wellbeing of Health Care Workers in Lusaka, Zambia During the COVID-19 Pandemic

|                               |                                                                                                                                                                                                                                                                                                                                                                                                                                                                                                                                                                                                                                                                                                                                                                                                                                                                                                                                                                                                                                                                                                                                                                                    |
|-------------------------------|------------------------------------------------------------------------------------------------------------------------------------------------------------------------------------------------------------------------------------------------------------------------------------------------------------------------------------------------------------------------------------------------------------------------------------------------------------------------------------------------------------------------------------------------------------------------------------------------------------------------------------------------------------------------------------------------------------------------------------------------------------------------------------------------------------------------------------------------------------------------------------------------------------------------------------------------------------------------------------------------------------------------------------------------------------------------------------------------------------------------------------------------------------------------------------|
| Journal:                      | <i>BMJ Open</i>                                                                                                                                                                                                                                                                                                                                                                                                                                                                                                                                                                                                                                                                                                                                                                                                                                                                                                                                                                                                                                                                                                                                                                    |
| Manuscript ID                 | bmjopen-2022-069257                                                                                                                                                                                                                                                                                                                                                                                                                                                                                                                                                                                                                                                                                                                                                                                                                                                                                                                                                                                                                                                                                                                                                                |
| Article Type:                 | Original research                                                                                                                                                                                                                                                                                                                                                                                                                                                                                                                                                                                                                                                                                                                                                                                                                                                                                                                                                                                                                                                                                                                                                                  |
| Date Submitted by the Author: | 17-Oct-2022                                                                                                                                                                                                                                                                                                                                                                                                                                                                                                                                                                                                                                                                                                                                                                                                                                                                                                                                                                                                                                                                                                                                                                        |
| Complete List of Authors:     | <p>Simbeza, Sandra; Center for Infectious Disease Research in Zambia<br/> Mutale, Jacob; Center for Infectious Disease Research in Zambia, Implementation Science Unit<br/> Mulabe, Musunge; Center for Infectious Disease Research in Zambia<br/> Jere, Lazarus; Center for Infectious Disease Research in Zambia<br/> Bukankala, Chama; Center for Infectious Disease Research in Zambia<br/> Sikazwe, Izukanji; Center for Infectious Disease Research in Zambia, Chief Executive Officer<br/> Bolton-Moore, Carolyn; Center for Infectious Disease Research in Zambia; The University of Alabama at Birmingham School of Medicine, Infectious Disease<br/> Mody, Aaloke; Washington University in St Louis, Infectious Diseases<br/> Geng, Elvin; Washington University in St Louis School of Medicine<br/> Sharma, Anjali; Center for Infectious Disease Research in Zambia<br/> Beres, Laura K ; Johns Hopkins University Bloomberg School of Public Health, Department of International Health<br/> Pry, Jake; Center for Infectious Disease Research in Zambia, Implementation Science Unit; University of California Davis School of Medicine, Public Health Sciences</p> |
| Keywords:                     | COVID-19, EPIDEMIOLOGY, HIV & AIDS < INFECTIOUS DISEASES, MENTAL HEALTH                                                                                                                                                                                                                                                                                                                                                                                                                                                                                                                                                                                                                                                                                                                                                                                                                                                                                                                                                                                                                                                                                                            |
|                               |                                                                                                                                                                                                                                                                                                                                                                                                                                                                                                                                                                                                                                                                                                                                                                                                                                                                                                                                                                                                                                                                                                                                                                                    |

SCHOLARONE™  
Manuscripts

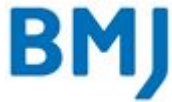

I, the Submitting Author has the right to grant and does grant on behalf of all authors of the Work (as defined in the below author licence), an exclusive licence and/or a non-exclusive licence for contributions from authors who are: i) UK Crown employees; ii) where BMJ has agreed a CC-BY licence shall apply, and/or iii) in accordance with the terms applicable for US Federal Government officers or employees acting as part of their official duties; on a worldwide, perpetual, irrevocable, royalty-free basis to BMJ Publishing Group Ltd ("BMJ") its licensees and where the relevant Journal is co-owned by BMJ to the co-owners of the Journal, to publish the Work in this journal and any other BMJ products and to exploit all rights, as set out in our [licence](#).

The Submitting Author accepts and understands that any supply made under these terms is made by BMJ to the Submitting Author unless you are acting as an employee on behalf of your employer or a postgraduate student of an affiliated institution which is paying any applicable article publishing charge ("APC") for Open Access articles. Where the Submitting Author wishes to make the Work available on an Open Access basis (and intends to pay the relevant APC), the terms of reuse of such Open Access shall be governed by a Creative Commons licence – details of these licences and which [Creative Commons](#) licence will apply to this Work are set out in our licence referred to above.

Other than as permitted in any relevant BMJ Author's Self Archiving Policies, I confirm this Work has not been accepted for publication elsewhere, is not being considered for publication elsewhere and does not duplicate material already published. I confirm all authors consent to publication of this Work and authorise the granting of this licence.

## Mental Wellbeing of Health Care Workers in Lusaka, Zambia During the COVID-19 Pandemic

Sandra Simbeza<sup>1</sup>, Jacob Mutale<sup>1</sup>, Musunge Mulabe<sup>1</sup>, Lazarus Jere<sup>1</sup>, Chama Bukankala<sup>1</sup>, , Izukanji Sikazwe<sup>1</sup>, Carolyn Bolton Moore<sup>1,3</sup>, Aaloke Mody<sup>4</sup>, Elvin H. Geng<sup>4</sup>, Anjali Sharma<sup>1</sup>, Laura K. Beres<sup>2†</sup>, Jake M. Pry<sup>1,5§†</sup>

<sup>1</sup>Centre for infectious Disease Research in Zambia, Lusaka Zambia

<sup>2</sup>Department of International Health, Johns Hopkins Bloomberg School of Public Health, Baltimore, MD USA

<sup>3</sup>School of Medicine, University of Alabama, Birmingham AL, USA

<sup>4</sup>School of Medicine, Washington University in St. Louis, MO USA

<sup>5</sup>Department of Public Health Sciences, School of Medicine, University of California, Davis, CA, USA

†Authors contributed equally to manuscript

§ Corresponding author: Jake M. Pry

Jake M. Pry, PhD, MPH  
Centre for Infectious Disease Research Zambia  
Plot 34620 Danny Pule Road, Mass Media  
Lusaka, Zambia 10101  
jake.pry@cidrz.org | jmpry@ucdavis.edu  
Phone: +1 936 661 6885

Keywords: Health Care Workers, Depression, COVID-19, PHQ-9

## **Abstract**

**Objectives:** We sought to assess mental health among HCWs in the context of COVID-19 across 24 health facilities in Lusaka Province, Zambia.

**Methods:** We implemented the, well-validated, Patient Health Questionnaire (PHQ-9) to assess depression through a cross-sectional study of HCWs recruited through convenience sampling during 11 August - 15 October 2020 during the second wave of the COVID-19 epidemic in Zambia. Potential participants were invited from 24 government-funded health facilities in Lusaka Province, Zambia. We used mixed-effects, adjusted Poisson regression to estimate the marginal probability of HCW experiencing depression that may warrant intervention (PHQ-9 score  $\geq 5$ ) by healthcare facility.

**Results:** We collected PHQ-9 survey responses from 713 professional and lay HCWs. Overall, 334 (46.8%, 95% CI: 43.1, .50.6%) HCWs recorded a PHQ-9 score  $\geq 5$ , indicating the need for further screening and assessment for mental health disorders, as well as preventative interventions, to minimize the possibility of poor health outcomes. We identified significant heterogeneity across facilities and observed a greater proportion of HCWs in facilities providing COVID-19 testing and treatment services with symptoms of depression.

**Conclusions:** Mental wellbeing may be a concern for a large proportion of HCW in Zambia. Further work to understand the magnitude and etiologies of mental health disorders amongst HCW in the public sector is needed to design effective interventions to meet the need for mental health support.

1  
2  
3 25 **BMJ Open Questions:**

4 26 *Strengths and Limitations of this study*

- 5 27
- 6 27 • These data represent important insight regarding the state of mental wellness among a large
  - 7 28 sample of healthcare workers during a public health crisis in a resource limited setting.
  - 8 28
  - 9 29 • Mental wellness, like depression, is not documented well in resource limited settings and
  - 10 30 we measure here mental wellness in a high-risk group of healthcare workers during the
  - 11 30 COVID-19 pandemic.
  - 12 31
  - 13 31
  - 14 32 • An important limitation is lack of data on demographics of healthcare worker respondents
  - 15 32 due to concern about stigma around mental wellness and potential to identify individuals
  - 16 33 given inclusion of clinics with small staff.
  - 17 33
  - 18 34
  - 19 34
  - 20 35 • We include a large number (N=24) of facilities to appreciate the heterogeneity in symptoms
  - 21 35 of depression among mental health in the sampled facilities in Lusaka Province of Zambia.
  - 22 36
  - 23 36
  - 24 37
  - 25 37
  - 26 37
  - 27 37
  - 28 37
  - 29 37
  - 30 37
  - 31 37
  - 32 37
  - 33 37
  - 34 37
  - 35 37
  - 36 37
  - 37 37
  - 38 37
  - 39 37
  - 40 37
  - 41 37
  - 42 37
  - 43 37
  - 44 37
  - 45 37
  - 46 37
  - 47 37
  - 48 37
  - 49 37
  - 50 37
  - 51 37
  - 52 37
  - 53 37
  - 54 37
  - 55 37
  - 56 37
  - 57 37
  - 58 37
  - 59 37
  - 60 37

## 38 Introduction

39 Coronavirus disease 2019 (COVID-19) has caused substantial global health hardship and  
40 healthcare workers (HCWs) position on the frontlines of the public health response, places them  
41 at great risk for negative effects on health and wellbeing. In addition to excess occupational hazard  
42 of contracting COVID-19, their experience as care givers increases risk of developing mental  
43 health disorders such as anxiety, depression, trauma, insomnia, and stress, which may lead to poor  
44 physical and psychological wellbeing [1]. A healthy workforce is critical to effectively managing  
45 and mitigating COVID-19, as well as providing continuity of high-quality care for other chronic  
46 and acute health conditions [2, 3]. Even prior to COVID-19, countries in sub-Saharan Africa faced  
47 limited medical infrastructure, supplies, and an over-burdened workforce, which challenged the  
48 provision of quality healthcare [4, 5]. These challenges, along with pandemic-sensitive barriers  
49 such as limited access to personal protective equipment (PPE) further exacerbated HCW stress and  
50 vulnerability. While HCWs in resource limited settings have demonstrated resilience, poor mental  
51 health is likely to compromise their ability to make decisions, as well as impact patient interactions  
52 [6]. Mental health services, like other health resources, are limited, with few trained mental health  
53 providers[7]. Understanding mental health and wellbeing among HCWs can catalyze interventions  
54 to provide treatment and improve the healthcare facility environment for the HCWs and patients  
55 [7].

56 Several studies have been conducted to assess mental wellness impact of the pandemic amongst  
57 HCWs however, the majority of these studies focus on the continent of Asia and very little data is  
58 available for HCWs in Africa [8, 9]. Limited data from Kenya and Ethiopia provides evidence that  
59 the prevalence of mental disorders such as depression, insomnia and stress were higher among  
60 those HCWs caring for patients with COVID-19, or in areas of higher infection prevalence  
61 compared to those working with non-COVID-19 patients or less [1, 10-14]. The most prevalent  
62 reported mental health conditions among health care workers are depression, insomnia, and  
63 anxiety [15]. Characterization of the state of mental wellness during the COVID-19 pandemic in  
64 Sub-Saharan African countries among HCWs, specifically in Zambia remains incomplete [10, 16].

65  
66 As part of a larger patient-centered care study, we collected facility-level measures to understand  
67 the context of care at 24 study sites. As a part of establishing care context we assessed mental  
68 health, specifically depression, using the nine item Patient Health Questionnaire (PHQ-9) in the

69 context of COVID-19 among HCWs in Lusaka Province, Zambia from 11 August 2020 to 15  
70 October 2020 [17].

## 72 **Methods**

### 73 *Setting*

74 This cross-sectional study is nested within a larger study, Person Centered Public Health for HIV  
75 Treatment in Zambia (PCPH), a cluster-randomized trial to assess HIV care and outcomes running  
76 from August 2018 to November 2021 across 24 government-funded health facilities in Lusaka  
77 Province (Pan African Clinical Trial Registry number: PACTR202101847907585). All  
78 participating facilities offered HIV care services and varied in size and location. Facilities were  
79 assigned codes to protect the identity of the HCW participants. As a part of the PCPH package  
80 adaptation to the COVID-19 pandemic, we implemented the PHQ-9 to screen for presence and  
81 severity of depression. The PHQ-9 has been previously used in Zambia to screen for likelihood of  
82 depression [20], and has been validated in Tanzania and South Africa which are similar settings  
83 as Zambia [18, 19]. The PHQ-9 instrument was translated from English into Nyanja and Bemba,  
84 the most commonly spoken Zambian languages in Lusaka Province, where the survey was  
85 conducted [20].

### 87 *Study Population*

88 We developed a cohort of HCWs that primarily provide HIV care at one of the 24 health facilities  
89 in the PCPH study. This was done by compiling all HCW's contact details from the HCWs who  
90 had, at the time of the introduction of the PHQ-9 measure to the study, participated in the HCW  
91 survey component of the PCPH study. The PCPH sample was comprised of both professional and  
92 lay HCWs including nurses, pharmacists, treatment supporters, midwives, medical doctors,  
93 radiographers, and general workers. To augment participation in the PHQ-9 data collection, we  
94 expanded the PHQ-9 sample to include any HCW willing to participate and had  $\geq 6$  months  
95 working experience at the study facility. We informed the facility in-charge of the PHQ-9 study  
96 opportunity who communicated it to staff members.

### 98 *Measurements*



1  
2  
3 99 Trained study research assistants then visited the facility and discussed the study opportunity in-  
4 person with available staff members. Those who expressed interest were screened for eligibility,  
5 100 offered the opportunity to verbally consent and with immediate participation. Depending on the  
6 101 participant preference, the standard PHQ-9 survey was self-administered on paper or surveyor-  
7 102 administered by trained study research assistants in the participant's preferred language.  
8 103 Potentially identifying information such as age, sex, and HCW cadre were not collected from  
9 104 respondents to protect privacy.  
10 105  
11 106

### 17 107 *Analysis*

18 108 We followed the standard, 27-point scoring system for the PHQ-9 to identify participants with  
19 109 scores consistent with minimal (0-4), mild (5-9), moderate (10-14), moderately severe (15-19),  
20 110 and severe depression (20-27) [18]. Our main outcome was mild depression or great (PHQ-9 score  
21 111  $\geq 5$ ) as this level of depression warrants additional clinical follow-up. We developed frequency  
22 112 tables and used a bar graphs to illustrate the distribution of PHQ-9 scores by healthcare facility.  
23 113 We developed scatter plots of adjusted marginal probability with 95% confidence intervals to  
24 114 illustrate the probability that a HCW will have a PHQ-9 score  $\geq 5$  by healthcare facility. We used  
25 115 mixed effects Poisson regression to estimate prevalence ratios for those with mild depression  
26 116 allowing random effects at the facility level and measured fixed effects for month of survey and  
27 117 clinic size category. Facilities were categorized by client population estimates as small (<40,000  
28 118 clients), medium (40,000-100,000 clients), and large (>100,000 clients).  
29 119

### 39 120 *Patient and Public Involvement*

40 121 The parent study, focused primarily on improving the patient experience at routine clinic visits  
41 122 through HCW mentorship and support including assessments of mental wellness through  
42 123 administration of the PHQ-9 tool, the results of which are captured here. The research approach  
43 124 and content is based on previous research, human-centered design workshops, and stakeholder  
44 125 collaborations [21-27]. We invited HCWs from each of the study facilities to attend a human-  
45 126 centered design workshop with expert direction from a professional consulting group in  
46 127 Washington DC. The results of this workshop were incorporated into the patient experience  
47 128 feedback summary design for the study clinics and the implementation of trained patient  
48 129 assessment was modified to improve transparency and acceptability. Patients were not directly  
49  
50  
51  
52  
53  
54  
55  
56  
57  
58  
59  
60

involved in the design, nor the recruitment of this sub-study assessing the mental wellness of HCWs. The findings of this study as well as the parent study will be shared with the Zambian Ministry of Health as well as the study facilities.

133

#### 134 *Ethics*

135 This study was approved as part of the larger PCPH study by the University of Zambia Biomedical  
136 Ethics Committee and the University of Alabama at Birmingham Institution Review Board, and  
137 the National Health Research Authority in Zambia. We obtained waiver of written informed  
138 consent and obtained verbal consent from participants prior to administering the survey.

139

#### 140 **Results**

141 A total of 713 HCWs from 24 facilities across Lusaka and Chongwe districts in the Lusaka  
142 Province were included in the analysis dataset (**Table 1**). Of the 713 responses, 231 (32.4%)  
143 reported mild depression (PHQ-9 score 5-9) and 81 (11.4%) reported moderate depression of  
144 (PHQ-9 score 10-14). The majority (69.6%) of the PHQ-9 survey responses were collected in  
145 September 2020 (**Table 1**). Responses for PHQ-9 questions were largely complete with <1%  
146 responses missing.

147

148 **Table 1: Participant characteristics**

| Factor   | Level | n (%)    |
|----------|-------|----------|
| N        |       | 713      |
| Facility | 1     | 30 (4.2) |
|          | 2     | 30 (4.2) |
|          | 3     | 30 (4.2) |
|          | 4     | 30 (4.2) |
|          | 5     | 30 (4.2) |
|          | 6     | 30 (4.2) |
|          | 7     | 30 (4.2) |
|          | 8     | 30 (4.2) |
|          | 9     | 30 (4.2) |
|          | 10    | 30 (4.2) |
|          | 11    | 30 (4.2) |
|          | 12    | 27 (3.8) |

|                              |                   |            |
|------------------------------|-------------------|------------|
|                              | 13                | 27 (3.8)   |
|                              | 14                | 30 (4.2)   |
|                              | 15                | 30 (4.2)   |
|                              | 16                | 30 (4.2)   |
|                              | 17                | 30 (4.2)   |
|                              | 18                | 30 (4.2)   |
|                              | 19                | 30 (4.2)   |
|                              | 20                | 30 (4.2)   |
|                              | 21                | 30 (4.2)   |
|                              | 22                | 30 (4.2)   |
|                              | 23                | 29 (4.1)   |
|                              | 24                | 30 (4.2)   |
| Clinic Population (category) | Small             | 147 (20.6) |
|                              | Medium            | 269 (37.7) |
|                              | Large             | 297 (41.7) |
| PHQ-9 Score Category         | minimal           | 379 (53.2) |
|                              | mild              | 231 (32.4) |
|                              | moderate          | 81 (11.4)  |
|                              | moderately severe | 17 (2.4)   |
|                              | severe            | 5 (0.7)    |
| Month of Survey              | August 2020       | 205 (28.8) |
|                              | September 2020    | 496 (69.6) |
|                              | October 2020      | 12 (1.7)   |

149 Note: PHQ-9 – nine-item patient health questionnaire.

150  
151 A total of 81 (11.4) respondents had a PHQ-9 score corresponding to moderate depression across  
152 all but one facility, 17 (2.4%) respondents had PHQ-9 scores consistent with moderately severe  
153 depression across four facilities and five (0.7%) HCWs had PHQ-9 scores consistent with severe  
154 depression across five different facilities (**Fig 1, Table 2**).

155  
156 **Table 2: Proportion of the analysis population by PHQ-9 score category with 95% confidence**  
157 **intervals (N=713)**

| <i>Variable</i> | <i>n</i> | <i>Proportion (%)</i> | <i>95% CI</i> |
|-----------------|----------|-----------------------|---------------|
| ≥5 PHQ-9 score  | 334      | 46.8                  | (43.1, 50.6)  |
| Mild            | 231      | 32.4                  | (29.0, 36.0)  |
| Moderate        | 81       | 11.4                  | (9.1, 13.9)   |
| Moderate-severe | 17       | 2.4                   | (1.4, 3.8)    |
| Severe          | 5        | 0.7                   | (0.2, 1.6)    |

158 Note: CI – confidence interval; PHQ-9 – nine-item patient health questionnaire.

1  
2  
3 159  
4  
5  
6 160 Though we observed facility-level mental health heterogeneity in proportion of minimal and  
7  
8 161 mild depression scores across clinics, the proportion of scores consistent with moderate  
9  
10 162 depression remain relatively stable across facilities (**Fig 1A**).

11  
12 163  
13  
14 164 **Figure 1: A) Stacked bar chart of proportion population by PHQ-9 score category by**  
15 165 **healthcare facility B) Stacked bar chart of proportion population by PHQ-9 score by**  
16 166 **facility population size category**  
17 167

18 168  
19  
20 169 Mixed effects adjusted Poisson regression model did not reveal clinic size or month of survey as  
21  
22  
23 170 a significant predictor of PHQ-9 score  $\geq 5$  (**Table 3**).

24  
25 171  
26 172 **Table 3: Adjusted Poisson regression results (N=713)**

| <i>Covariate</i>                   | <i>level</i> | <i>aPR</i> | <i>95% CI</i> | <i>p-value</i> |
|------------------------------------|--------------|------------|---------------|----------------|
| Clinic<br>Population<br>(category) | small        | 1.12       | (0.95, 1.33)  | 0.170          |
|                                    | medium       | 1.00 (ref) | ref           | ref            |
|                                    | large        | 1.04       | (0.81, 1.33)  | 0.763          |
| Month of<br>Survey                 | August       | 1.00 (ref) | ref           | ref            |
|                                    | September    | 1.14       | (0.94, 1.38)  | 0.193          |
|                                    | October      | 0.98       | (0.54, 1.79)  | 0.945          |

27  
28  
29  
30  
31  
32  
33  
34  
35  
36  
37 173 Note: adjusted for survey week and facility  
38  
39 174

40 175 We illustrate significant heterogeneity in the marginal probability of experiencing greater than  
41  
42 176 minimal depression across facilities (**Fig 2**). Notably higher marginal probability of HCWs with  
43  
44 177 PHQ-9 score  $\geq 5$  was observed in both COVID-19 treatment centers and non-COVID-19 treatment  
45  
46 178 centers, facilities 4 and 16.

47 179  
48  
49 180 **Figure 2: Marginal probability of healthcare worker with >minimal depression per PHQ-9**  
50  
51 181 **score by clinic.**

52 182  
53  
54 183 Note: PHQ-9 – nine-item patient health questionnaire.  
55  
56 184

## 185 Discussion

186 We found that a large proportion of the HCW population had a PHQ-9 score  $\geq 5$  indicating need  
187 for some level of mental wellness follow-up 46.8% (95% CI: 43.1, 50.6%). Variation in depression  
188 outcomes ranged from 82.7% (95% CI: 68.5, 96.9%) at one of the two large COVID-19 treatment  
189 facilities to 28.4% (95% CI: 13.0, 43.9%) at a medium-sized healthcare facility. Differences in  
190 clinic characteristics, such as size of catchment population and location could contribute to the  
191 variations in depression outcomes among the facilities.

192  
193 Past studies show that frontline HCW working in clinics, considered to be highly infectious, such  
194 as COVID-19 treatment centers, were more prone to developing depression and other mental  
195 disorders than their counterparts in other departments [10]. This is in consistent with the results of  
196 our study, which shows that HCWs working at COVID-19 treatment facilities had a marginal  
197 probability of experiencing mild to moderately severe depression. In addition, results of our study  
198 demonstrate that HCWs have experienced symptoms of depression during the onset of the COVID-  
199 19 pandemic in Zambia, which is consistent with the findings of similar studies using the PHQ-9  
200 in other parts of the world where a pooled prevalence of mild depression was found to be 36.1%  
201 (95% confidence interval [CI], 31.3%-41.0%) [28]. Studies conducted in Zambia among nurses  
202 and midwives, and in Ethiopia among different cadres of HCWs shows that mental disorders which  
203 include depression are prevalent among HCWs during the COVID-19 pandemic [29]. Similarly,  
204 globally studies, indicate, that the risk of HCWs developing mental health disorders during the  
205 pandemic exist [3, 28, 29]. The difficult conditions to which HCWs may be exposed including  
206 extended working hours, risk of exposure to the disease, increased workload exposure to the  
207 disease, concerns about transmitting the infection to their family members, limited resources to  
208 care for their patients, may exacerbate or initialize mental wellbeing issues leading to symptoms  
209 of depression [30, 31].

210  
211 The heterogeneity in proportions of HCWs with depression may be driven by facility size, where  
212 reduced resources at smaller facilities including, but not limited to, personal protective equipment  
213 (PPE), hand hygiene station/station supplies at clinic entrance, and less access to knowledge about  
214 the COVID-19 response in Zambia compared to larger facilities in urban Lusaka. While the  
215 response to the COVID-19 pandemic was standardized, to a certain extent, by guidance from the

1  
2  
3 216 provincial and zonal levels, the culture and leadership unique to each facility might have played a  
4  
5 217 key role in the healthcare worker experience, contributing to PHQ-9 score distribution differences  
6  
7 218 across facilities.

8  
9 219  
10 220 As we continue to recognize the mental health services gap across many populations in resource-  
11  
12 221 limited settings we give evidence here to support prioritization of healthcare workers, especially  
13  
14 222 during public health shocks/emergencies like that presented by COVID-19. Mental wellness  
15  
16 223 challenges among HCWs could lead to poor health outcomes for the HCW workforce and have a  
17  
18 224 sort of “knock-on” effect negatively impacting the quality of care provided to patients [32, 33].  
19  
20 225 Interventions like Friendship Bench piloted in neighboring Zimbabwe designed to encourage  
21  
22 226 positive coping mechanism among HCWs and build a working environment that provides empathy  
23  
24 227 and compassion towards staff may be an efficient option to provide mental wellness support [34,  
25  
26 228 35]. Furthermore, system-based interventions should also be encouraged such as change in  
27  
28 229 working culture and reduction in possible system contributors to HCW stress that could lead to  
29  
30 230 depression. Increasing mobile technology availability may further allow for the use of mobile  
31  
32 231 health (mHealth) based mental wellness services leveraging the framework presented by Osei for  
33  
34 232 low- and middle-income countries [36, 37]. Low-cost intervention packages used for patients can  
35  
36 233 be adapted for HCWs and integrated into system-based interventions. They include routine  
37  
38 234 screening for early detection, mental wellness education, problem solving and use of anti-  
39  
40 235 depressants, cognitive behavior therapy which can be delivered successfully by trained lay HCWs  
41  
42 236 [38, 39].

43 237

### 44 238 **Limitations**

45 239 This study had some potential limitations. Firstly, we did not collect participants demographics  
46  
47 240 such as age, sex, marital status, and sex. As such we were not able to adjust for these co- founders.  
48  
49 241 Accounting for these would help make associations in outcomes of depression. Secondly, we  
50  
51 242 employed convenience sampling in selecting participants, this sampling approach may limit  
52  
53 243 representativeness of study the results to the wider population of HCWs. Finally, without pre-  
54  
55 244 COVID 19 estimates of depression among healthcare workers in Lusaka, we are not able to show  
56  
57 245 association between mild-severe depression with the pandemic however, we show that during the  
58  
59 246 pandemic that depression was high and attention to this population is justified to ensure a healthy

1  
2  
3 247 HCW workforce. Additionally, though potentially highest than a non-pandemic baseline, these  
4  
5 248 results may be useful as subsequent measures of depression and mental wellness are collected  
6  
7 249 among HCWs.

8 250

9  
10 251 **Conclusions**

11 252 Depression is a common public health problem; our study demonstrates that HCWs in Zambia  
12  
13 253 may suffer from a high prevalence of depressive symptoms. Routine mental health wellness is  
14  
15 254 important to better understand the role that the COVID-19 pandemic may have had on depression  
16  
17 255 among HCWS in Zambia. Furthermore, support for HCW mental wellness can serve to accelerate  
18  
19 256 destigmatizing mental health issues and improve the quality of care provided across healthcare  
20  
21 257 centers in Zambia.

22 258

23 259  
24  
25  
26  
27  
28  
29  
30  
31  
32  
33  
34  
35  
36  
37  
38  
39  
40  
41  
42  
43  
44  
45  
46  
47  
48  
49  
50  
51  
52  
53  
54  
55  
56  
57  
58  
59  
60

1  
2  
3 **260 Competing interests**  
4

5 261 Authors do not have competing interests to report.  
6  
7 262

8 **263 Authors' contributions**  
9

10 264 SS: Data Collection, Data Framing, Manuscript Writing

11 265 JM: Data Collection, Data Curation, Data Analysis

12 266 MM: Data Collection, Data Curation

13 267 LJ: Data Framing

14 268 CB: Data Framing

15 269 KS: Conceptualization

16 270 IS: Conceptualization

17 271 CBM: Conceptualization

18 272 AM: Analysis Review, Manuscript Review/Editing

19 273 EHG: Conceptualization

20 274 AS: Conceptualization, Manuscript Review/Editing

21 275 LKB: Conceptualization, Data Analysis, Data Framing, Manuscript Writing

22 276 JMP: Data Analysis Lead, Data Framing, Manuscript Writing  
23  
24 277

25 **278 Author information**  
26

27 279 [not aware of anything needed here]  
28  
29 280

30 **281 Acknowledgements**  
31  
32  
33

34 282 We would like to thank the Zambian Ministry of Health for their leadership to ensure those in  
35 283 care continue to receive life-saving HIV treatment. We would also like to thank the healthcare  
36 284 workers for their participation in the PHQ-9 assessment as well as their faithful delivery of care  
37 285 to patients in the face of the many challenges presented by the COVID-19 pandemic. To the  
38 286 clients seen at our study facilities we would like to extend sincere thanks for your cooperation  
39 287 and patience.  
40  
41  
42  
43  
44  
45  
46  
47  
48  
49  
50  
51  
52  
53

54 288

55 **289 Funding**  
56  
57  
58  
59  
60



1  
2  
3 290 Research reported in this publication was supported by the Bill & Melinda Gates Foundation grant  
4  
5 291 number OPP1166485, the National Institute Of Mental Health of the National Institutes of Health  
6  
7 292 under award number F31MH109378 (L.K.B.), and the National Institute of Allergy and Infectious  
8  
9 293 Diseases of the National Institutes of Health under award number K24 AI134413 (E.G.).

10 294

11  
12 295 **Disclaimer**

13 296 None

14 297

15  
16  
17 298 **List of abbreviations** [Optional]

18 299 ART: antiretroviral therapy

19 300 CI- Confidence Interval

20 301 COVID-19: Coronavirus Disease 2019

21 302 HCW: Health Care Worker

22 303 PCPH: Person- Centered Public Health for HIV Treatment in Zambia

23 304 PHQ-9: Patient Health Questionnaire 9

24 305

25  
26  
27 306 **Data Sharing**

28 307 Data used for this analysis is available through Dryad data repository (doi:10.25338/B8S646)

29 308

30  
31 309 **References**32 310 1. Robertson L, Maposa I, Somaroo H, Johnson O. Mental health of healthcare workers  
33 311 during the COVID-19 outbreak: A rapid scoping review to inform provincial guidelines in South  
34 312 Africa. *South African Medical Journal*. 2020;110(10):1010-9.35 313 2. Gupta S, Sahoo S. Pandemic and mental health of the front-line healthcare workers: a  
36 314 review and implications in the Indian context amidst COVID-19. *General Psychiatry*. 2020;33(5).37 315 3. Saragih ID, Tonapa SI, Saragih IS, Advani S, Batubara SO, Suarilah I, et al. Global  
38 316 Prevalence of Mental Health Problems among healthcare workers during The Covid-19 Pandemic:  
39 317 A Systematic Review and Meta-Analysis. *International Journal of Nursing Studies*. 2021:104002.40 318 4. Ayanore MA, Amuna N, Aviisah M, Awolu A, Kipo-Sunyezi DD, Mogre V, et al.  
41 319 Towards resilient health systems in sub-saharan africa: A systematic review of the english  
42 320 language literature on health workforce, surveillance, and health governance issues for health  
43 321 systems strengthening. *Annals of global health*. 2019;85(1).44 322 5. Semo B-w, Frissa SM. The mental health impact of the COVID-19 pandemic: implications  
45 323 for sub-Saharan Africa. *Psychology Research and Behavior Management*. 2020;13:713.

- 324 6. Med S. Serious Health Workforce Shortage in Zambia: *Solidar Med*; 2020 [updated 22  
325 December 2020; cited 2022 16 January 2022]. Available from:  
326 <https://www.solidarmed.ch/en/news/shortage-skilled-workers-health-system-zambia>.
- 327 7. Munakampe MN. Strengthening mental health systems in Zambia. *International journal of*  
328 *mental health systems*. 2020;14(1):1-9.
- 329 8. Deng D, Naslund JA. Psychological impact of COVID-19 Pandemic on frontline health  
330 workers in low-and middle-income countries. *Harvard public health review (Cambridge, Mass)*.  
331 2020;28.
- 332 9. Moitra M, Rahman M, Collins PY, Gohar F, Weaver M, Kinuthia J, et al. Mental health  
333 consequences for healthcare workers during the COVID-19 pandemic: a scoping review to draw  
334 lessons for LMICs. *Frontiers in psychiatry*. 2021;12:22.
- 335 10. Shah J, Monroe-Wise A, Talib Z, Nabiswa A, Said M, Abeid A, et al. Mental health  
336 disorders among healthcare workers during the COVID-19 pandemic: a cross-sectional survey  
337 from three major hospitals in Kenya. *BMJ open*. 2021;11(6):e050316.
- 338 11. Chersich MF, Gray G, Fairlie L, Eichbaum Q, Mayhew S, Allwood B, et al. COVID-19 in  
339 Africa: care and protection for frontline healthcare workers. *Global Health*. 2020;16(1):46. Epub  
340 2020/05/18. doi: 10.1186/s12992-020-00574-3. PubMed PMID: 32414379; PubMed Central  
341 PMCID: PMCPMC7227172.
- 342 12. Yitayih Y, Mekonen S, Zeynudin A, Mengistie E, Ambelu A. Mental health of healthcare  
343 professionals during the early stage of the COVID-19 pandemic in Ethiopia. *BJPsych Open*.  
344 2020;7(1):e1. Epub 2020/12/02. doi: 10.1192/bjo.2020.130. PubMed PMID: 33256883; PubMed  
345 Central PMCID: PMCPMC7844150.
- 346 13. Jemal K, Deriba BS, Geleta TA, Tesema M, Awol M, Mengistu E, et al. Self-Reported  
347 Symptoms of Depression, Anxiety, and Stress Among Healthcare Workers in Ethiopia During the  
348 COVID-19 Pandemic: A Cross-Sectional Study. *Neuropsychiatr Dis Treat*. 2021;17:1363-73.  
349 Epub 2021/05/15. doi: 10.2147/NDT.S306240. PubMed PMID: 33986596; PubMed Central  
350 PMCID: PMCPMC8110274.
- 351 14. Asnakew S, Amha H, Kassew T. Mental Health Adverse Effects of COVID-19 Pandemic  
352 on Health Care Workers in North West Ethiopia: A Multicenter Cross-Sectional Study.  
353 *Neuropsychiatr Dis Treat*. 2021;17:1375-84. Epub 2021/05/18. doi: 10.2147/NDT.S306300.  
354 PubMed PMID: 33994787; PubMed Central PMCID: PMCPMC8113010.
- 355 15. Sahebi A, Nejati-Zarnaqi B, Moayedi S, Yousefi K, Torres M, Golitaleb M. The prevalence  
356 of anxiety and depression among healthcare workers during the COVID-19 pandemic: An  
357 umbrella review of meta-analyses. *Prog Neuropsychopharmacol Biol Psychiatry*.  
358 2021;107:110247. Epub 2021/01/22. doi: 10.1016/j.pnpbp.2021.110247. PubMed PMID:  
359 33476692; PubMed Central PMCID: PMCPMC7817526.
- 360 16. Elbay RY, Kurtulmuş A, Arpacioğlu S, Karadere E. Depression, anxiety, stress levels of  
361 physicians and associated factors in Covid-19 pandemics. *Psychiatry research*. 2020;290:113130.
- 362 17. Kroenke K, Spitzer RL, Williams JB. The PHQ-9: validity of a brief depression severity  
363 measure. *Journal of general internal medicine*. 2001;16(9):606-13. doi: 10.1046/j.1525-  
364 1497.2001.016009606.x. PubMed PMID: 11556941.
- 365 18. Kroenke K, Spitzer RL, Williams JB. The PHQ-9: validity of a brief depression severity  
366 measure. *Journal of general internal medicine*. 2001;16(9):606-13.
- 367 19. Kroenke K, Spitzer RL, Williams JB, Löwe B. The patient health questionnaire somatic,  
368 anxiety, and depressive symptom scales: a systematic review. *General hospital psychiatry*.  
369 2010;32(4):345-59.

- 1  
2  
3 370 20. Sawka KS, Mbewe C, Josephat D, Ngulube E. The Senga of Zambia: Linguistic Survey  
4 371 Report with Recommendations for Literature Development Strategy. SIL International: 2021.  
5 372 21. Beres LK, Simbeza S, Holmes CB, Mwamba C, Mukamba N, Sharma A, et al. Human-  
6 373 centered design lessons for implementation science: improving the implementation of a patient-  
7 374 centered care intervention. *Journal of acquired immune deficiency syndromes (1999)*.  
8 375 2019;82(3):S230.  
9 376 22. Mody A, Tram KH, Glidden DV, Eshun-Wilson I, Sikombe K, Mehrotra M, et al. Novel  
10 377 Longitudinal Methods for Assessing Retention in Care: a Synthetic Review. *Current HIV/AIDS*  
11 378 *Reports*. 2021;18(4):299-308.  
12 379 23. Sikombe K, Mody A, Kadota J, Pry JJ, Simbeza S, Eshun-Wilson I, et al. Understanding  
13 380 patient transfers across multiple clinics in Zambia among HIV infected adults. *PloS one*.  
14 381 2020;15(11):e0241477.  
15 382 24. Holmes CB, Sanne I. Changing models of care to improve progression through the HIV  
16 383 treatment cascade in different populations. *Current Opinion in HIV and AIDS*. 2015;10(6):447-  
17 384 50.  
18 385 25. Holmes CB, Sikazwe I, Sikombe K, Eshun-Wilson I, Czaicki N, Beres LK, et al. Estimated  
19 386 mortality on HIV treatment among active patients and patients lost to follow-up in 4 provinces of  
20 387 Zambia: Findings from a multistage sampling-based survey. *PLoS Med*. 2018;15(1):e1002489.  
21 388 Epub 2018/01/13. doi: 10.1371/journal.pmed.1002489. PubMed PMID: 29329301; PubMed  
22 389 Central PMCID: PMC5766235.  
23 390 26. Roy M, Czaicki N, Holmes C, Chavan S, Tsitsi A, Odeny T, et al. Understanding Sustained  
24 391 Retention in HIV/AIDS Care and Treatment: a Synthetic Review. *Current HIV/AIDS Reports*.  
25 392 2016:1-9.  
26 393 27. Mwamba C, Sharma A, Mukamba N, Beres L, Geng E, Holmes CB, et al. 'They care  
27 394 rudely!': resourcing and relational health system factors that influence retention in care for people  
28 395 living with HIV in Zambia. *BMJ Glob Health*. 2018;3(5):e001007. Epub 2018/11/30. doi:  
29 396 10.1136/bmjgh-2018-001007. PubMed PMID: 30483408; PubMed Central PMCID:  
30 397 PMC6231098.  
31 398 28. Li Y, Scherer N, Felix L, Kuper H. Prevalence of depression, anxiety and post-traumatic  
32 399 stress disorder in health care workers during the COVID-19 pandemic: A systematic review and  
33 400 meta-analysis. *PloS one*. 2021;16(3):e0246454.  
34 401 29. Mulatu HA, Tesfaye M, Woldeyes E, Bayisa T, Fisseha H, Kassu RA. The prevalence of  
35 402 common mental disorders among healthcare professionals during the COVID-19 pandemic at a  
36 403 tertiary Hospital in Addis Ababa, Ethiopia. *Journal of Affective Disorders Reports*.  
37 404 2021;6:100246. doi: <https://doi.org/10.1016/j.jadr.2021.100246>.  
38 405 30. Mokhtari R, Moayedi S, Golitaleb M. COVID-19 pandemic and health anxiety among  
39 406 nurses of intensive care units. *International journal of mental health nursing*. 2020;29(6):1275.  
40 407 31. Pfefferbaum B, North CS. Mental health and the Covid-19 pandemic. *New England Journal*  
41 408 *of Medicine*. 2020;383(6):510-2.  
42 409 32. Saasa Y. An Assessment on the Role of Human Rights and Governance in Health Service  
43 410 Delivery 2019.  
44 411 33. Kola L, Kohrt BA, Hanlon C, Naslund JA, Sikander S, Balaji M, et al. COVID-19 mental  
45 412 health impact and responses in low-income and middle-income countries: reimagining global  
46 413 mental health. *The Lancet Psychiatry*. 2021;8(6):535-50. doi: [https://doi.org/10.1016/S2215-](https://doi.org/10.1016/S2215-0366(21)00025-0)  
47 414 [0366\(21\)00025-0](https://doi.org/10.1016/S2215-0366(21)00025-0).

- 1  
2  
3 415 34. Abraham A, Chaabna K, Doraiswamy S, Bhagat S, Sheikh J, Mamtani R, et al. Depression  
4 416 among healthcare workers in the Eastern Mediterranean Region: a systematic review and meta-  
5 417 analysis. *Human resources for health*. 2021;19(1):1-18.  
6  
7 418 35. Wallén A, Eberhard S, Landgren K. The Experiences of Counsellors Offering Problem-  
8 419 Solving Therapy for Common Mental Health Issues at the Youth Friendship Bench in Zimbabwe.  
9 420 *Issues in Mental Health Nursing*. 2021;42(9):808-17. doi: 10.1080/01612840.2021.1879977.  
10 421 36. Osei E, Mashamba-Thompson TP. Mobile health applications for disease screening and  
11 422 treatment support in low-and middle-income countries: A narrative review. *Heliyon*.  
12 423 2021;7(3):e06639. Epub 2021/04/20. doi: 10.1016/j.heliyon.2021.e06639. PubMed PMID:  
13 424 33869857; PubMed Central PMCID: PMC8035664.  
14 425 37. Mutimushi PM, Mupenda BM, Manda PM, Nankonde N, Banda B, Mung'omba K, et al.  
15 426 ZICTA 2019 Annual Report.  
16 427 [https://www.zicta.zm/storage/posts/attachments/oiBT4oMnpJoN3dgHKpvByoDmNXq5ZDYtp3](https://www.zicta.zm/storage/posts/attachments/oiBT4oMnpJoN3dgHKpvByoDmNXq5ZDYtp3sxVYM3.pdf)  
17 428 [sxVYM3.pdf](https://www.zicta.zm/storage/posts/attachments/oiBT4oMnpJoN3dgHKpvByoDmNXq5ZDYtp3sxVYM3.pdf): Zambia Information and Communications Technology Authority (ZICTA), 2019.  
18 429 38. Chibanda D, Mesu P, Kajawu L, Cowan F, Araya R, Abas MA. Problem-solving therapy  
19 430 for depression and common mental disorders in Zimbabwe: piloting a task-shifting primary mental  
20 431 health care intervention in a population with a high prevalence of people living with HIV. *BMC*  
21 432 *public health*. 2011;11(1):1-10.  
22 433 39. Patel V, Simon G, Chowdhary N, Kaaya S, Araya R. Packages of care for depression in  
23 434 low-and middle-income countries. *PLoS medicine*. 2009;6(10):e1000159.  
24 435  
25  
26  
27

### 436 Supplement:

437  
438 Figure S1: Histogram of total PHQ-9 scores among study participants  
439  
440  
441  
442  
443  
444  
445  
446  
447  
448  
449  
450  
451  
452  
453  
454  
455  
456  
457  
458  
459  
460

A

Page 19 of 22

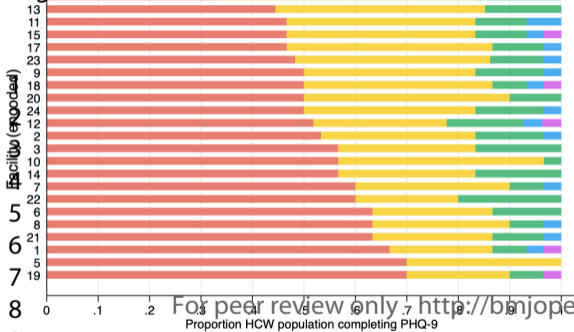

B

BMJ Open

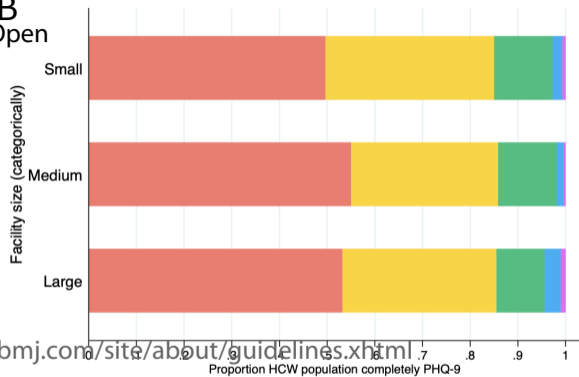

Minimal Mild Moderate Moderate-Severe Severe

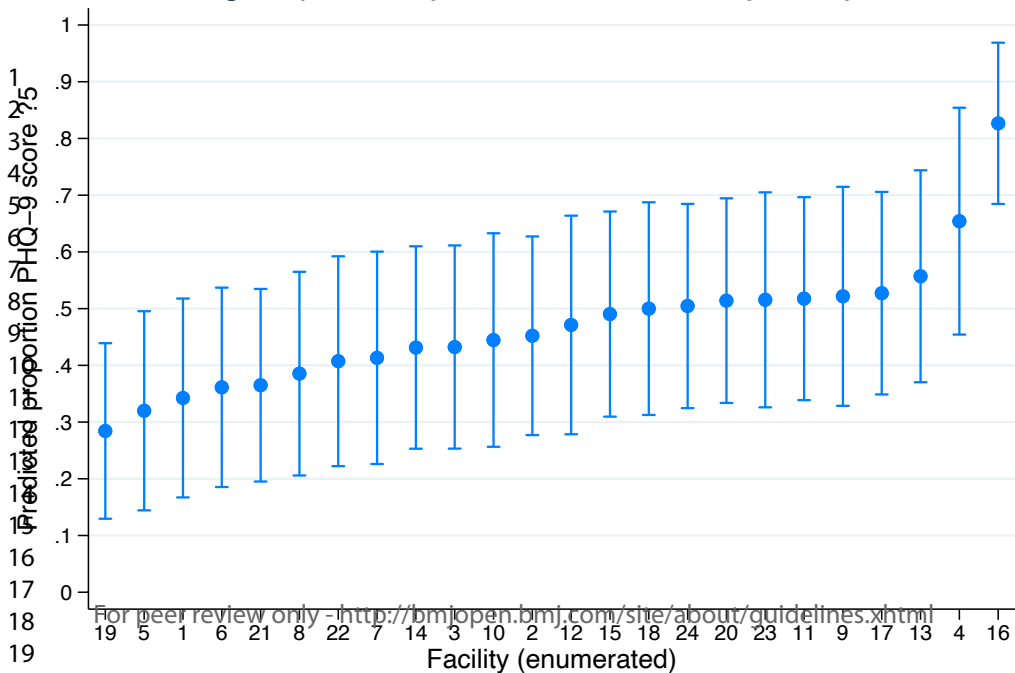

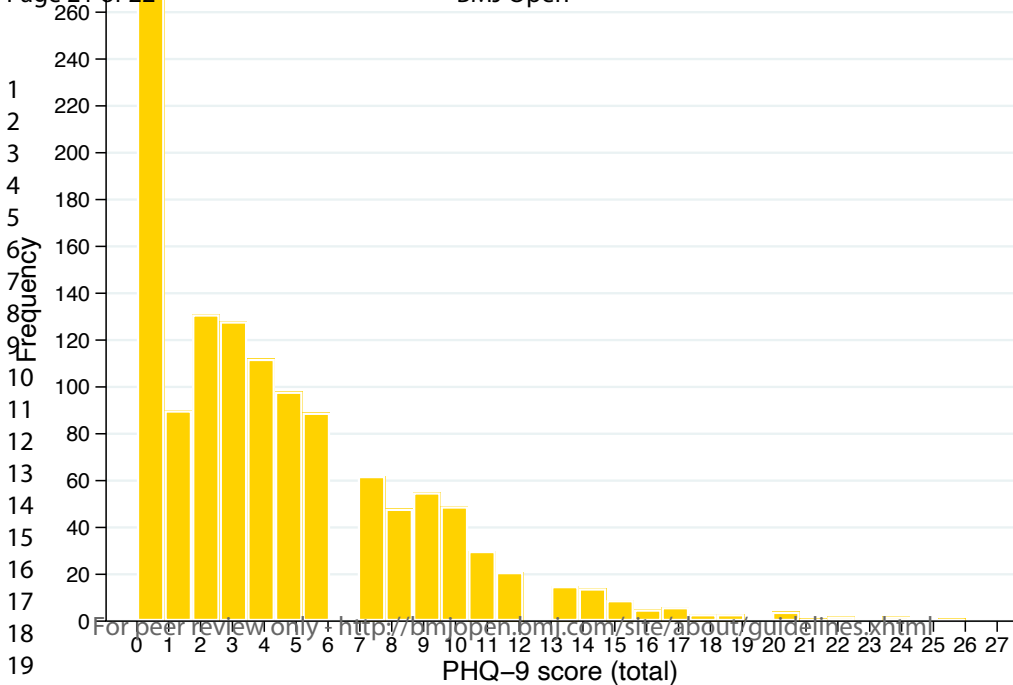

STROBE Statement—Checklist of items that should be included in reports of *cohort studies*

|                           | Item No | Recommendation                                                                                                                                                                                    | Page No |
|---------------------------|---------|---------------------------------------------------------------------------------------------------------------------------------------------------------------------------------------------------|---------|
| <b>Title and abstract</b> | 1       | (a) Indicate the study's design with a commonly used term in the title or the abstract                                                                                                            | 2       |
|                           |         | (b) Provide in the abstract an informative and balanced summary of what was done and what was found                                                                                               | 2       |
| <b>Introduction</b>       |         |                                                                                                                                                                                                   |         |
| Background/rationale      | 2       | Explain the scientific background and rationale for the investigation being reported                                                                                                              | 4       |
| Objectives                | 3       | State specific objectives, including any prespecified hypotheses                                                                                                                                  | 4, 5    |
| <b>Methods</b>            |         |                                                                                                                                                                                                   |         |
| Study design              | 4       | Present key elements of study design early in the paper                                                                                                                                           | 5       |
| Setting                   | 5       | Describe the setting, locations, and relevant dates, including periods of recruitment, exposure, follow-up, and data collection                                                                   | 5       |
| Participants              | 6       | (a) Give the eligibility criteria, and the sources and methods of selection of participants. Describe methods of follow-up                                                                        | 5, 6    |
|                           |         | (b) For matched studies, give matching criteria and number of exposed and unexposed                                                                                                               | NA      |
| Variables                 | 7       | Clearly define all outcomes, exposures, predictors, potential confounders, and effect modifiers. Give diagnostic criteria, if applicable                                                          | 5, 6    |
| Data sources/measurement  | 8*      | For each variable of interest, give sources of data and details of methods of assessment (measurement). Describe comparability of assessment methods if there is more than one group              | 5, 6    |
| Bias                      | 9       | Describe any efforts to address potential sources of bias                                                                                                                                         | 5, 6    |
| Study size                | 10      | Explain how the study size was arrived at                                                                                                                                                         | 5       |
| Quantitative variables    | 11      | Explain how quantitative variables were handled in the analyses. If applicable, describe which groupings were chosen and why                                                                      | 5, 6    |
| Statistical methods       | 12      | (a) Describe all statistical methods, including those used to control for confounding                                                                                                             | 6       |
|                           |         | (b) Describe any methods used to examine subgroups and interactions                                                                                                                               | 6       |
|                           |         | (c) Explain how missing data were addressed                                                                                                                                                       | 6       |
|                           |         | (d) If applicable, explain how loss to follow-up was addressed                                                                                                                                    | NA      |
|                           |         | (e) Describe any sensitivity analyses                                                                                                                                                             | 6       |
| <b>Results</b>            |         |                                                                                                                                                                                                   |         |
| Participants              | 13*     | (a) Report numbers of individuals at each stage of study—eg numbers potentially eligible, examined for eligibility, confirmed eligible, included in the study, completing follow-up, and analysed | 7, 8    |
|                           |         | (b) Give reasons for non-participation at each stage                                                                                                                                              | NA      |
|                           |         | (c) Consider use of a flow diagram                                                                                                                                                                | NA      |
| Descriptive data          | 14*     | (a) Give characteristics of study participants (eg demographic, clinical, social) and information on exposures and potential confounders                                                          | 7, 8    |
|                           |         | (b) Indicate number of participants with missing data for each variable of interest                                                                                                               | 7, 8    |
|                           |         | (c) Summarise follow-up time (eg, average and total amount)                                                                                                                                       | NA      |
| Outcome data              | 15*     | Report numbers of outcome events or summary measures over time                                                                                                                                    | 7, 8    |



|    |                          |    |                                                                                                                                                                                                              |        |
|----|--------------------------|----|--------------------------------------------------------------------------------------------------------------------------------------------------------------------------------------------------------------|--------|
| 1  | Main results             | 16 | (a) Give unadjusted estimates and, if applicable, confounder-adjusted estimates and their precision (eg, 95% confidence interval). Make clear which confounders were adjusted for and why they were included | 7, 8   |
| 2  |                          |    | (b) Report category boundaries when continuous variables were categorized                                                                                                                                    | 7, 8   |
| 3  |                          |    | (c) If relevant, consider translating estimates of relative risk into absolute risk for a meaningful time period                                                                                             | NA     |
| 4  |                          |    |                                                                                                                                                                                                              |        |
| 5  | Other analyses           | 17 | Report other analyses done—eg analyses of subgroups and interactions, and sensitivity analyses                                                                                                               | 9      |
| 6  |                          |    |                                                                                                                                                                                                              |        |
| 7  |                          |    |                                                                                                                                                                                                              |        |
| 8  |                          |    |                                                                                                                                                                                                              |        |
| 9  |                          |    |                                                                                                                                                                                                              |        |
| 10 |                          |    |                                                                                                                                                                                                              |        |
| 11 | <b>Discussion</b>        |    |                                                                                                                                                                                                              |        |
| 12 | Key results              | 18 | Summarise key results with reference to study objectives                                                                                                                                                     | 10     |
| 13 | Limitations              | 19 | Discuss limitations of the study, taking into account sources of potential bias or imprecision. Discuss both direction and magnitude of any potential bias                                                   | 11, 12 |
| 14 | Interpretation           | 20 | Give a cautious overall interpretation of results considering objectives, limitations, multiplicity of analyses, results from similar studies, and other relevant evidence                                   | 9, 10  |
| 15 | Generalisability         | 21 | Discuss the generalisability (external validity) of the study results                                                                                                                                        | 9, 10  |
| 16 |                          |    |                                                                                                                                                                                                              |        |
| 17 | <b>Other information</b> |    |                                                                                                                                                                                                              |        |
| 18 | Funding                  | 22 | Give the source of funding and the role of the funders for the present study and, if applicable, for the original study on which the present article is based                                                | 13, 14 |
| 19 |                          |    |                                                                                                                                                                                                              |        |
| 20 |                          |    |                                                                                                                                                                                                              |        |
| 21 |                          |    |                                                                                                                                                                                                              |        |
| 22 |                          |    |                                                                                                                                                                                                              |        |
| 23 |                          |    |                                                                                                                                                                                                              |        |
| 24 |                          |    |                                                                                                                                                                                                              |        |
| 25 |                          |    |                                                                                                                                                                                                              |        |
| 26 |                          |    |                                                                                                                                                                                                              |        |
| 27 |                          |    |                                                                                                                                                                                                              |        |
| 28 |                          |    |                                                                                                                                                                                                              |        |
| 29 |                          |    |                                                                                                                                                                                                              |        |
| 30 |                          |    |                                                                                                                                                                                                              |        |
| 31 |                          |    |                                                                                                                                                                                                              |        |
| 32 |                          |    |                                                                                                                                                                                                              |        |
| 33 |                          |    |                                                                                                                                                                                                              |        |
| 34 |                          |    |                                                                                                                                                                                                              |        |
| 35 |                          |    |                                                                                                                                                                                                              |        |
| 36 |                          |    |                                                                                                                                                                                                              |        |
| 37 |                          |    |                                                                                                                                                                                                              |        |
| 38 |                          |    |                                                                                                                                                                                                              |        |
| 39 |                          |    |                                                                                                                                                                                                              |        |
| 40 |                          |    |                                                                                                                                                                                                              |        |
| 41 |                          |    |                                                                                                                                                                                                              |        |
| 42 |                          |    |                                                                                                                                                                                                              |        |
| 43 |                          |    |                                                                                                                                                                                                              |        |
| 44 |                          |    |                                                                                                                                                                                                              |        |
| 45 |                          |    |                                                                                                                                                                                                              |        |
| 46 |                          |    |                                                                                                                                                                                                              |        |
| 47 |                          |    |                                                                                                                                                                                                              |        |
| 48 |                          |    |                                                                                                                                                                                                              |        |
| 49 |                          |    |                                                                                                                                                                                                              |        |
| 50 |                          |    |                                                                                                                                                                                                              |        |
| 51 |                          |    |                                                                                                                                                                                                              |        |
| 52 |                          |    |                                                                                                                                                                                                              |        |
| 53 |                          |    |                                                                                                                                                                                                              |        |
| 54 |                          |    |                                                                                                                                                                                                              |        |
| 55 |                          |    |                                                                                                                                                                                                              |        |
| 56 |                          |    |                                                                                                                                                                                                              |        |
| 57 |                          |    |                                                                                                                                                                                                              |        |
| 58 |                          |    |                                                                                                                                                                                                              |        |
| 59 |                          |    |                                                                                                                                                                                                              |        |
| 60 |                          |    |                                                                                                                                                                                                              |        |

\*Give information separately for exposed and unexposed groups.

**Note:** An Explanation and Elaboration article discusses each checklist item and gives methodological background and published examples of transparent reporting. The STROBE checklist is best used in conjunction with this article (freely available on the Web sites of PLoS Medicine at <http://www.plosmedicine.org/>, Annals of Internal Medicine at <http://www.annals.org/>, and Epidemiology at <http://www.epidem.com/>). Information on the STROBE Initiative is available at <http://www.strobe-statement.org>.

# BMJ Open

## A cross-sectional study to assess depression among health care workers in Lusaka, Zambia during the COVID-19 pandemic

|                                 |                                                                                                                                                                                                                                                                                                                                                                                                                                                                                                                                                                                                                                                                                                                                                                                                                                                                                                                                                                                                                                                                                                                                                                                                                                                                                                                 |
|---------------------------------|-----------------------------------------------------------------------------------------------------------------------------------------------------------------------------------------------------------------------------------------------------------------------------------------------------------------------------------------------------------------------------------------------------------------------------------------------------------------------------------------------------------------------------------------------------------------------------------------------------------------------------------------------------------------------------------------------------------------------------------------------------------------------------------------------------------------------------------------------------------------------------------------------------------------------------------------------------------------------------------------------------------------------------------------------------------------------------------------------------------------------------------------------------------------------------------------------------------------------------------------------------------------------------------------------------------------|
| Journal:                        | <i>BMJ Open</i>                                                                                                                                                                                                                                                                                                                                                                                                                                                                                                                                                                                                                                                                                                                                                                                                                                                                                                                                                                                                                                                                                                                                                                                                                                                                                                 |
| Manuscript ID                   | bmjopen-2022-069257.R1                                                                                                                                                                                                                                                                                                                                                                                                                                                                                                                                                                                                                                                                                                                                                                                                                                                                                                                                                                                                                                                                                                                                                                                                                                                                                          |
| Article Type:                   | Original research                                                                                                                                                                                                                                                                                                                                                                                                                                                                                                                                                                                                                                                                                                                                                                                                                                                                                                                                                                                                                                                                                                                                                                                                                                                                                               |
| Date Submitted by the Author:   | 29-Dec-2022                                                                                                                                                                                                                                                                                                                                                                                                                                                                                                                                                                                                                                                                                                                                                                                                                                                                                                                                                                                                                                                                                                                                                                                                                                                                                                     |
| Complete List of Authors:       | <p>Simbeza, Sandra; Center for Infectious Disease Research in Zambia<br/> Mutale, Jacob; Center for Infectious Disease Research in Zambia, Implementation Science Unit<br/> Mulabe, Musunge; Center for Infectious Disease Research in Zambia<br/> Jere, Lazarus; Center for Infectious Disease Research in Zambia<br/> Bukankala, Chama; Center for Infectious Disease Research in Zambia<br/> Sikombe, Kombatende; Center for Infectious Disease Research in Zambia, Implementation Science Unit, Research department<br/> Sikazwe, Izukanji; Center for Infectious Disease Research in Zambia, Chief Executive Officer<br/> Bolton-Moore, Carolyn; Center for Infectious Disease Research in Zambia; The University of Alabama at Birmingham School of Medicine, Infectious Disease<br/> Mody, Aaloke; Washington University in St Louis, Infectious Diseases<br/> Geng, Elvin; Washington University in St Louis School of Medicine<br/> Sharma, Anjali; Center for Infectious Disease Research in Zambia<br/> Beres, Laura K ; Johns Hopkins University Bloomberg School of Public Health, Department of International Health<br/> Pry, Jake; Center for Infectious Disease Research in Zambia, Implementation Science Unit; University of California Davis School of Medicine, Public Health Sciences</p> |
| <b>Primary Subject Heading</b>: | Mental health                                                                                                                                                                                                                                                                                                                                                                                                                                                                                                                                                                                                                                                                                                                                                                                                                                                                                                                                                                                                                                                                                                                                                                                                                                                                                                   |
| Secondary Subject Heading:      | HIV/AIDS, Health services research, Haematology (incl blood transfusion), Epidemiology, Global health                                                                                                                                                                                                                                                                                                                                                                                                                                                                                                                                                                                                                                                                                                                                                                                                                                                                                                                                                                                                                                                                                                                                                                                                           |
| Keywords:                       | COVID-19, EPIDEMIOLOGY, HIV & AIDS < INFECTIOUS DISEASES, MENTAL HEALTH                                                                                                                                                                                                                                                                                                                                                                                                                                                                                                                                                                                                                                                                                                                                                                                                                                                                                                                                                                                                                                                                                                                                                                                                                                         |
|                                 |                                                                                                                                                                                                                                                                                                                                                                                                                                                                                                                                                                                                                                                                                                                                                                                                                                                                                                                                                                                                                                                                                                                                                                                                                                                                                                                 |

SCHOLARONE™  
Manuscripts



I, the Submitting Author has the right to grant and does grant on behalf of all authors of the Work (as defined in the below author licence), an exclusive licence and/or a non-exclusive licence for contributions from authors who are: i) UK Crown employees; ii) where BMJ has agreed a CC-BY licence shall apply, and/or iii) in accordance with the terms applicable for US Federal Government officers or employees acting as part of their official duties; on a worldwide, perpetual, irrevocable, royalty-free basis to BMJ Publishing Group Ltd ("BMJ") its licensees and where the relevant Journal is co-owned by BMJ to the co-owners of the Journal, to publish the Work in this journal and any other BMJ products and to exploit all rights, as set out in our [licence](#).

The Submitting Author accepts and understands that any supply made under these terms is made by BMJ to the Submitting Author unless you are acting as an employee on behalf of your employer or a postgraduate student of an affiliated institution which is paying any applicable article publishing charge ("APC") for Open Access articles. Where the Submitting Author wishes to make the Work available on an Open Access basis (and intends to pay the relevant APC), the terms of reuse of such Open Access shall be governed by a Creative Commons licence – details of these licences and which [Creative Commons](#) licence will apply to this Work are set out in our licence referred to above.

Other than as permitted in any relevant BMJ Author's Self Archiving Policies, I confirm this Work has not been accepted for publication elsewhere, is not being considered for publication elsewhere and does not duplicate material already published. I confirm all authors consent to publication of this Work and authorise the granting of this licence.

1  
2  
3 **A cross-sectional study to assess depression among health care workers in Lusaka, Zambia**  
4 **during the COVID-19 pandemic.**  
5  
6  
7

8 Sandra Simbeza<sup>1</sup>, Jacob Mutale<sup>1</sup>, Musunge Mulabe<sup>1</sup>, Lazarus Jere<sup>1</sup>, Chama Bukankala<sup>1</sup>,  
9 Kombatende Sikombe<sup>1</sup>, Izukanji Sikazwe<sup>1</sup>, Carolyn Bolton Moore<sup>1,2</sup>, Aaloke Mody<sup>3</sup>, Elvin H.  
10 Geng<sup>3</sup>, Anjali Sharma<sup>1</sup>, Laura K. Beres<sup>2†</sup>, Jake M. Pry<sup>1,5§†</sup>  
11  
12

13 <sup>1</sup>Centre for infectious Disease Research in Zambia, Lusaka Zambia

14 <sup>2</sup>Division of Infectious Diseases, Department of Internal Medicine, School of Medicine, University  
15 of Alabama, Birmingham AL, USA

16 <sup>3</sup> Department of Internal Medicine School of Medicine, Washington University in St. Louis, MO  
17 USA

18 <sup>4</sup>Department of International Health, Johns Hopkins Bloomberg School of Public Health,  
19 Baltimore, MD USA

20 <sup>5</sup>Department of Public Health Sciences, School of Medicine, University of California, Davis, CA,  
21 USA  
22  
23

24  
25 †Authors contributed equally to manuscript

26  
27 § Corresponding author: Jake M. Pry  
28  
29

30 Jake M. Pry, PhD, MPH  
31 Centre for Infectious Disease Research Zambia  
32 Plot 34620 Danny Pule Road, Mass Media  
33 Lusaka, Zambia 10101  
34 jake.pry@cidrz.org | jmpry@ucdavis.edu  
35 Phone: +1 936 661 6885  
36  
37  
38

39 Keywords: Health Care Workers, Depression, COVID-19, PHQ-9  
40  
41  
42  
43  
44  
45  
46  
47  
48  
49  
50  
51  
52  
53  
54  
55  
56  
57  
58  
59  
60

## **Abstract**

**Objectives:** We sought to assess depression among health care workers (HCWs) in the context of COVID-19 in Lusaka Province, Zambia.

**Design:** This cross-sectional study is nested within a larger study, Person Centered Public Health for HIV Treatment in Zambia (PCPH), a cluster-randomized trial to assess HIV care and outcomes.

**Setting:** The research was conducted in 24 government-run health facilities during 11 August - 15 October 2020 during the second wave of the COVID-19 epidemic in Lusaka, Zambia.

**Participants:** We used convenience sampling to recruit HCW participants who were previously enrolled in the PCPH study, had more than 6 months experience working at the facility and were voluntarily willing to participate.

**Primary outcome measures:** We implemented the well-validated Patient Health Questionnaire (PHQ-9) to assess HCW depression. We used mixed-effects, adjusted Poisson regression to estimate the marginal probability of HCW experiencing depression that may warrant intervention (PHQ-9 score  $\geq 5$ ) by health care facility.

**Results:** We collected PHQ-9 survey responses from 713 professional and lay HCWs. Overall, 334 (46.8%, 95% CI: 43.1, .50.6%) HCWs recorded a PHQ-9 score  $\geq 5$ , indicating the need for further assessment and potential intervention for depression. We identified significant heterogeneity across facilities and observed a greater proportion of HCWs with symptoms of depression in facilities providing COVID-19 testing and treatment services.

**Conclusions:** Depression may be a concern for a large proportion of HCW in Zambia. Further work to understand the magnitude and etiologies of depression amongst HCW in the public sector is needed to design effective preventative and treatment interventions to meet the need for mental health support and to minimize poor health outcomes.

**BMJ Open Questions:***Strengths and Limitations of this study*

- These data represent important insight regarding the state of mental wellness among a large sample of health care workers during a public health crisis in a resource limited setting.
- Mental wellness, like depression, is not documented well in resource limited settings and we measure here mental wellness in a high-risk group of health care workers during the COVID-19 pandemic.
- We include a large number (N=24) of facilities to appreciate the heterogeneity in symptoms of depression among mental health in the sampled facilities in Lusaka Province of Zambia.
- An important limitation is lack of data on demographics of health care worker respondents due to concern about stigma around mental wellness and potential to identify individuals given inclusion of clinics with small staff.
- Without pre-COVID 19 estimates of depression among health care workers in Lusaka, we are not able to show association between mild-severe depression with the pandemic; however, we show that during the pandemic that depression was high and attention to this population is justified to ensure a healthy HCW workforce.

## 47 **Introduction**

48 Coronavirus disease 2019 (COVID-19) has caused substantial global health hardship and health  
49 care workers (HCWs) position on the frontlines of the public health response places them at great  
50 risk for negative effects on health and wellbeing[1,[1]. In addition to excess occupational hazard  
51 of contracting COVID-19, their experience as care givers increases their risk of developing mental  
52 health disorders such as anxiety, depression, trauma, insomnia, and stress, which may lead to poor  
53 physical and psychological wellbeing [2]. A healthy workforce is critical to effectively managing  
54 and mitigating COVID-19, as well as providing continuity of high-quality care for other chronic  
55 and acute health conditions [3, 4]. Even prior to COVID-19, countries in sub-Saharan Africa faced  
56 limited medical infrastructure, supplies, and an over-burdened workforce, which challenged HCW  
57 wellbeing and the provision of quality health care [5, 6]. These challenges, along with pandemic-  
58 sensitive barriers such as limited access to personal protective equipment (PPE) further  
59 exacerbated HCW stress and vulnerability. While HCWs in resource limited settings have  
60 demonstrated resilience, poor mental health is likely to compromise their ability to make decisions,  
61 as well as impact patient interactions [7]. Mental health services, like other health resources, are  
62 limited, with few trained mental health providers[8]. Understanding mental health and wellbeing  
63 among HCWs can catalyze interventions to provide treatment and improve the health care facility  
64 environment for the HCWs and patients [8].

65  
66 Several studies have been conducted to assess mental wellness impact of the pandemic amongst  
67 HCWs however, the majority of these studies focus on the continent of Asia and very little data is  
68 available for HCWs in Africa [9-11]. Limited data from Kenya and Ethiopia provides evidence  
69 that the prevalence of mental disorders such as depression, insomnia and stress were higher among  
70 those HCWs caring for patients with COVID-19, or in areas of higher infection prevalence  
71 compared to those working with non-COVID-19 patients or less [2, 12-16]. The most prevalent  
72 reported mental health conditions among health care workers are depression, insomnia, and  
73 anxiety [17]. Characterization of the state of mental wellness during the COVID-19 pandemic in  
74 Sub-Saharan African countries among HCWs, specifically in Zambia remains incomplete [12, 18].

75  
76 As part of a larger patient-centered care study, we collected facility-level measures to understand  
77 the context of care at 24 study sites. As a part of establishing care context we assessed mental

1  
2  
3 78 health, specifically depression, using the nine item Patient Health Questionnaire (PHQ-9) in the  
4 79 context of COVID-19 among HCWs in Lusaka Province, Zambia from 11 August 2020 to 15  
5 80 October 2020 [19].  
6  
7  
8  
9

## 10 82 **Methods**

### 11 83 *Setting*

12 84 This cross-sectional study of HCW depression is nested within a larger study, Person Centered  
13 85 Public Health for HIV Treatment in Zambia (PCPH), a cluster-randomized trial to assess HIV care  
14 86 and outcomes running from August 2018 to November 2021 across 24 government-funded health  
15 87 facilities in Lusaka Province (Pan African Clinical Trial Registry number:  
16 88 PACTR202101847907585). All PHQ-9 responses were collected between 11 August 2020 and 15  
17 89 October 2020 among participating facilities that offered HIV care services and varied in size and  
18 90 location. Facilities were assigned codes to protect the identity of the HCW participants.  
19  
20  
21  
22  
23  
24  
25  
26

### 27 92 *Study Population*

28 93 We developed a cohort of HCWs that primarily provide HIV care at one of the 24 health facilities  
29 94 in the PCPH study. This was done by compiling all HCW's contact details from the HCWs who  
30 95 had, at the time of the introduction of the depression study, participated in the HCW survey  
31 96 component of the original PCPH study. The PCPH sample was comprised of both professional  
32 97 HCWs including nurses, pharmacists, midwives, medical doctors, radiographers, and lay HCWS  
33 98 including treatment supporters and general workers. To augment participation in the PHQ-9 data  
34 99 collection, we expanded the PHQ-9 sample to include any HCW willing to participate and had  $\geq 6$   
35 100 months working experience at the study facility. We informed the facility in-charge of the PHQ-9  
36 101 study opportunity who communicated it to staff members.  
37  
38  
39  
40  
41  
42  
43  
44  
45

### 46 103 *Measurements*

47 104 Trained study research assistants visited health care facilities and discussed the study opportunity  
48 105 in-person with available staff members. Those who expressed interest were screened for eligibility,  
49 106 offered the opportunity to verbally consent and with immediate participation. As a part of the  
50 107 PCPH adaptation to the COVID-19 pandemic, we implemented the nine-question Patient Health  
51 108 Questionnaire (PHQ-9) to screen for presence and severity of depression. The PHQ-9 has been  
52  
53  
54  
55  
56  
57  
58  
59  
60



1  
2  
3 109 previously used in Zambia to screen for likelihood of depression [20], and has been validated in  
4 110 Tanzania and South Africa which are similar settings as Zambia [20, 21]. The PHQ-9 instrument  
5 111 was translated from English into Nyanja and Bemba, the most commonly spoken Zambian  
6 112 languages in Lusaka Province, where the survey was conducted [22]. Depending on the participant  
7 113 preference, the standard PHQ-9 survey was self-administered on paper or surveyor-administered  
8 114 by trained study research assistants in the participant's preferred language. Potentially identifying  
9 115 information such as age, sex, and HCW cadre were not collected from respondents to protect  
10 116 privacy. Facility populations were categorized as small (<40,000 clients/year), medium (40,000-  
11 117 99,999 visits/year), and large ( $\geq 100,000$  visits/year) as recorded in 2019.  
12  
13  
14  
15  
16  
17  
18  
19

20 118  
21 119 *Analysis*  
22 120 We followed the standard, 27-point scoring system for the PHQ-9 to identify participants with  
23 121 scores consistent with minimal (0-4), mild (5-9), moderate (10-14), moderately severe (15-19),  
24 122 and severe depression (20-27) [19]. Our main outcome was mild depression or greater (PHQ-9  
25 123 score  $\geq 5$ ) as this level of depression warrants additional clinical follow-up [19]. We developed  
26 124 frequency tables and used a bar graphs to illustrate the distribution of PHQ-9 scores by health care  
27 125 facility. We developed scatter plots of adjusted marginal probability with 95% confidence intervals  
28 126 to illustrate the probability that a HCW will have a PHQ-9 score  $\geq 5$  by health care facility. We  
29 127 used mixed effects Poisson regression to estimate prevalence ratios for those with mild depression  
30 128 allowing random effects at the facility level and measured fixed effects for month of survey and  
31 129 clinic size category. Facilities were categorized by client population estimates as: small (<40,000  
32 130 clients), medium (40,000-100,000 clients), and large (>100,000 clients).  
33  
34  
35  
36  
37  
38  
39  
40  
41

42 131  
43 132 *Patient and Public Involvement*  
44 133 The parent study, focused primarily on improving the patient experience at routine clinic visits  
45 134 through HCW training, mentorship, and audit and feedback The research approach and content is  
46 135 based on participatory research with HCWs, human-centered design workshops, and stakeholder  
47 136 collaborations [23-29]. This research guided us to include measures of HCW satisfaction and  
48 137 wellbeing. In addition to a HCW experience measure throughout PCPH, the advent of COVID-19  
49 138 led us to include an assessment of HCW depression. Patients were not directly involved in the  
50 139 design, nor the recruitment of this sub-study assessing the depression levels of HCWs. The  
51  
52  
53  
54  
55  
56  
57  
58  
59  
60

140 findings of this study as well as the parent study will be shared with the Zambian Ministry of  
 141 Health as well as the study facilities.

142

### 143 *Ethics*

144 This study was approved as part of the larger PCPH study by the University of Zambia Biomedical  
 145 Ethics Committee and the University of Alabama at Birmingham Institution Review Board, and  
 146 the National Health Research Authority in Zambia. We obtained waiver of written informed  
 147 consent and obtained verbal consent from participants prior to administering the survey.

148

### 149 **Results**

150 A total of 713 HCWs from 24 facilities across Lusaka and Chongwe districts in the Lusaka  
 151 Province were included in the analysis dataset (**Table 1**). The majority (69.6%) of the PHQ-9  
 152 survey responses were collected in September 2020 (**Table 1**). The largest proportion of the  
 153 responses were collected at facilities serving a large client population (41.7%) followed closely by  
 154 facilities serving a medium-sized client population (37.7%) (**Table 1**). Responses for PHQ-9  
 155 questions were largely complete with <1% responses missing.

156

157 **Table 1: Participant characteristics**

| Factor   | Level | n (%)    |
|----------|-------|----------|
| N        |       | 713      |
| Facility | 1     | 30 (4.2) |
|          | 2     | 30 (4.2) |
|          | 3     | 30 (4.2) |
|          | 4     | 30 (4.2) |
|          | 5     | 30 (4.2) |
|          | 6     | 30 (4.2) |
|          | 7     | 30 (4.2) |
|          | 8     | 30 (4.2) |
|          | 9     | 30 (4.2) |
|          | 10    | 30 (4.2) |
|          | 11    | 30 (4.2) |
|          | 12    | 27 (3.8) |
|          | 13    | 27 (3.8) |

|                              |                |            |
|------------------------------|----------------|------------|
|                              | 14             | 30 (4.2)   |
|                              | 15             | 30 (4.2)   |
|                              | 16             | 30 (4.2)   |
|                              | 17             | 30 (4.2)   |
|                              | 18             | 30 (4.2)   |
|                              | 19             | 30 (4.2)   |
|                              | 20             | 30 (4.2)   |
|                              | 21             | 30 (4.2)   |
|                              | 22             | 30 (4.2)   |
|                              | 23             | 29 (4.1)   |
|                              | 24             | 30 (4.2)   |
| Clinic Population (category) | Small          | 147 (20.6) |
|                              | Medium         | 269 (37.7) |
|                              | Large          | 297 (41.7) |
| Month of Survey              | August 2020    | 205 (28.8) |
|                              | September 2020 | 496 (69.6) |
|                              | October 2020   | 12 (1.7)   |

Note:

Of the 713 responses, 231 (32.4%, 95%CI: 29.0-36.0) reported mild depression (PHQ-9 score 5-9), 81 (11.4% 95%CI: 9.1-13.9) reported moderate depression (PHQ-9 score 10-14). A total of 81 (11.4) respondents had a PHQ-9 score corresponding to moderate depression across all but one facility, 17 (2.4%, 95%CI: 1.4-3.8) respondents had PHQ-9 scores consistent with moderately severe depression across four facilities, and five (0.7%, 95%CI: 0.2-1.6) HCWs had PHQ-9 scores consistent with severe depression across five different facilities (**Fig 1, Fig S1, Table 2**).

**Table 2: Proportion of the analysis population by PHQ-9 score category with 95% confidence intervals (N=713)**

| <i>Variable</i> | <i>n</i> | <i>Proportion (%)</i> | <i>95% CI</i> |
|-----------------|----------|-----------------------|---------------|
| ≥5 PHQ-9 score  | 334      | 46.8                  | (43.1, 50.6)  |
| Mild            | 231      | 32.4                  | (29.0, 36.0)  |
| Moderate        | 81       | 11.4                  | (9.1, 13.9)   |
| Moderate-severe | 17       | 2.4                   | (1.4, 3.8)    |
| Severe          | 5        | 0.7                   | (0.2, 1.6)    |

Note: CI – confidence interval; PHQ-9 – nine-item patient health questionnaire.

1  
2  
3 171 Though we observed facility-level mental health heterogeneity in the proportion of minimal and  
4  
5 172 mild depression scores across clinics, the proportion of scores consistent with moderate  
6  
7  
8 173 depression remain relatively stable across facilities (**Fig 1A**).

9  
10 174  
11 175 **Figure 1: A) Stacked bar chart of proportion population by PHQ-9 score category by**  
12 **health care facility B) Stacked bar chart of proportion population by PHQ-9 score by**  
13 **facility population size category**  
14 177  
15 178

16 179 Mixed effects adjusted Poisson regression model did not reveal clinic size or month of survey as  
17  
18 180 a significant predictor of PHQ-9 score  $\geq 5$  (**Table 3**).

19  
20  
21 181 **Table 3: Adjusted Poisson regression results (N=713)**

| <i>Covariate</i>                   | <i>level</i> | <i>aPR</i> | <i>95% CI</i> | <i>p-value</i> |
|------------------------------------|--------------|------------|---------------|----------------|
| Clinic<br>Population<br>(category) | small        | 1.12       | (0.95, 1.33)  | 0.170          |
|                                    | medium       | 1.00 (ref) | ref           | ref            |
|                                    | large        | 1.04       | (0.81, 1.33)  | 0.763          |
| Month of<br>Survey                 | August       | 1.00 (ref) | ref           | ref            |
|                                    | September    | 1.14       | (0.94, 1.38)  | 0.193          |
|                                    | October      | 0.98       | (0.54, 1.79)  | 0.945          |

22  
23  
24  
25  
26  
27  
28  
29  
30  
31  
32 182 Note: adjusted for survey week and facility  
33 183

34 184 We illustrate significant heterogeneity in the marginal probability of experiencing greater than  
35  
36 185 minimal depression across facilities (**Fig 2**). Notably, the highest marginal probability of HCWs  
37  
38 186 with PHQ-9 score  $\geq 5$  was observed in a facility serving as a COVID-19 treatment center.  
39  
40 187

41 188 **Figure 2: Marginal probability of health care worker with >minimal depression per PHQ-9**  
42 **score by clinic.**  
43 189  
44  
45 190

46  
47 191 Note: PHQ-9 – nine-item patient health questionnaire.  
48  
49 192

## 50 193 **Discussion**

51  
52 194 We found that a large proportion of the HCW population had a PHQ-9 score  $\geq 5$  indicating a need  
53  
54 195 for follow-up to assess and improve mental wellbeing 46.8% (95% CI: 43.1, 50.6%). Variation in  
55  
56  
57  
58  
59  
60

196 depression outcomes ranged from 82.7% (95% CI: 68.5, 96.9%) at one of the two large COVID-  
197 19 treatment facilities to 28.4% (95% CI: 13.0, 43.9%) at a medium-sized health care facility.

198  
199 Our study shows that HCWs working at COVID-19 treatment facilities had a higher marginal  
200 probability of experiencing mild to moderately severe depression. This is consistent with past  
201 studies showing that frontline HCW working in clinics managing diseases considered to be highly  
202 infectious, such as COVID-19 treatment centers, were more prone to developing depression and  
203 other mental disorders than their counterparts in other departments [12]. In addition, results of our  
204 study demonstrate that HCWs have experienced symptoms of depression during the onset of the  
205 COVID-19 pandemic in Zambia, which is consistent with the findings of similar studies using the  
206 PHQ-9 in other parts of the world where a pooled prevalence of mild depression was found to be  
207 36.1% (95% confidence interval [CI], 31.3%-41.0%) [30]. Studies conducted in Zambia among  
208 nurses and midwives, and in Ethiopia among different cadres of HCWs show that mental disorders  
209 which include depression are prevalent among HCWs during the COVID-19 pandemic [31].  
210 Similarly, globally studies indicate that there is a risk of HCWs developing mental health disorders  
211 during the pandemic [4, 30, 31]. The difficult conditions to which HCWs may be exposed  
212 including extended working hours, risk of exposure to the disease, increased workload, concerns  
213 about transmitting the infection to their family members, reduced social connectedness, and  
214 limited resources to care for their patients may amplify poor mental wellbeing [1, 32-34].

215  
216 Further research is needed to understand heterogeneity in proportions of HCWs with depression.  
217 It may be associated variation in HCW access to resources such as, personal protective equipment  
218 (PPE), hand hygiene station/station supplies at clinic entrance, and knowledge about the COVID-  
219 19 response in Zambia. While the response to the COVID-19 pandemic was standardized, to a  
220 certain extent, by guidance from the provincial and zonal levels, the culture and leadership unique  
221 to each facility might have played a key role in the health care worker experience, contributing to  
222 PHQ-9 score distribution differences across facilities.

223  
224 As we continue to recognize the mental health services gap across many populations in resource-  
225 limited settings we give evidence here to support prioritization of health care workers, especially  
226 during public health shocks/emergencies like that presented by COVID-19. Presence of depression

227 among HCWs could lead to poor health outcomes for the HCW workforce and have a sort of  
228 “knock-on” effect negatively impacting the quality of care provided to patients [35, 36].  
229 Interventions like Friendship Bench piloted in neighboring Zimbabwe designed to encourage  
230 positive coping mechanism among HCWs and build a working environment that provides empathy  
231 and compassion towards staff may be an efficient option to provide mental wellness support [37,  
232 38]. Furthermore, system-based interventions should also be encouraged such as change in  
233 working culture and reduction in possible system contributors to HCW stress that could lead to  
234 depression. Increasing mobile technology availability may further allow for the use of mobile  
235 health (mHealth) based mental wellness services leveraging the framework presented by Osei for  
236 low- and middle-income countries [39, 40]. Low-cost intervention packages used for patients can  
237 be adapted for HCWs and integrated into system-based interventions. They include routine  
238 screening for early detection, mental wellness education, problem solving and use of anti-  
239 depressants, cognitive behavior therapy which can be delivered successfully by trained lay HCWs  
240 [41, 42].

241  
242 **Limitations**  
243 This study had some potential limitations. Firstly, we did not collect participants demographics  
244 such as age, sex, marital status, and sex. As such we were not able to adjust for these co- founders.  
245 Accounting for these would help make associations in outcomes of depression. Secondly, we  
246 employed convenience sampling in selecting participants, this sampling approach may limit  
247 representativeness of study the results to the wider population of HCWs. Finally, without pre-  
248 COVID 19 estimates of depression among health care workers in Lusaka, we are not able to show  
249 association between mild-severe depression with the pandemic however, we show that during the  
250 pandemic that depression was high and attention to this population is justified to ensure a healthy  
251 HCW workforce. Additionally, though potentially highest than a non-pandemic baseline, these  
252 results may be useful as subsequent measures of depression and mental wellness are collected  
253 among HCWs.

254  
255 **Conclusions**  
256 Depression is a common public health problem; our study demonstrates that HCWs in Zambia  
257 may suffer from a high prevalence of depressive symptoms that will require additional clinical

1  
2  
3 258 follow up. Routine mental health wellness is important to better understand the role that the  
4  
5 259 COVID-19 pandemic may have had on depression among HCWS in Zambia. Furthermore, support  
6  
7 260 for HCW mental wellness can serve to accelerate destigmatizing mental health issues and improve  
8  
9 261 the quality of care provided across health care centers in Zambia.

10 262  
11 263  
12  
13  
14  
15  
16  
17  
18  
19  
20  
21  
22  
23  
24  
25  
26  
27  
28  
29  
30  
31  
32  
33  
34  
35  
36  
37  
38  
39  
40  
41  
42  
43  
44  
45  
46  
47  
48  
49  
50  
51  
52  
53  
54  
55  
56  
57  
58  
59  
60

For peer review only

## 264 **Contributorship**

265 SS: data collection, data Framing, and manuscript writing, JM, KS, and MM: data collection and  
266 data curation, LJ and CB: data framing, IS, CBM and EHG: conceptualization, AM: manuscript  
267 review/editing, AS: conceptualization and manuscript review/editing LKB: conceptualization,  
268 data analysis, data framing, and manuscript writing, JMP: data analysis lead, data framing, and  
269 manuscript writing. The corresponding author attests that all listed authors meet authorship criteria  
270 and that no others meeting the criteria have been omitted.

271

## 272 **Funding**

273 Research reported in this publication was supported by the Bill & Melinda Gates Foundation grant  
274 number OPP1166485, the National Institute of Mental Health of the National Institutes of Health  
275 under award number F31MH109378 (L.K.B.), and the National Institute of Allergy and Infectious  
276 Diseases of the National Institutes of Health under award number K24 AI134413 (E.G.).

277

## 278 **Competing of Interests**

279 None

280

## 281 **Ethical Approval**

282 This study was approved as part of the larger PCPH study by the University of Zambia Biomedical  
283 Ethics Committee and the University of Alabama at Birmingham Institution Review Board, and  
284 the National Health Research Authority in Zambia. We obtained waiver of written informed  
285 consent and obtained verbal consent from participants prior to administering the survey.

286

## 287 **Data Sharing**

288 Data used for all analyses will be made available for public use through Dryad data repository:  
289 Pry, Jake et al. (2022), PHQ-9\_PCPH-19aug2022, <https://doi.org/10.25338/B8S646>.

290

## 291 **Acknowledgements**

292 We would like to thank the Zambian Ministry of Health for their leadership to ensure those in  
293 care continue to receive life-saving HIV treatment. We would also like to thank the health care



workers for their participation in the PHQ-9 assessment as well as their faithful delivery of care to patients in the face of the many challenges presented by the COVID-19 pandemic. To the clients seen at our study facilities we would like to extend sincere thanks for your cooperation and patience.

298

### 299 **List of abbreviations** [Optional]

300 ART: antiretroviral therapy

301 CI- Confidence Interval

302 COVID-19: Coronavirus Disease 2019

303 HCW: Health Care Worker

304 PCPH: Person- Centered Public Health for HIV Treatment in Zambia

305 PHQ-9: Patient Health Questionnaire 9

306

### 307 **Data Sharing**

308 Data used for this analysis is available through Dryad data repository (doi:10.25338/B8S646)

309

### 310 **References**

- 311 1. Yıldırım M, Çiçek İ, Şanlı ME. Coronavirus stress and COVID-19 burnout among  
312 healthcare staffs: The mediating role of optimism and social connectedness. *Curr Psychol.*  
313 2021;40(11):5763-71. Epub 2021/05/04. doi: 10.1007/s12144-021-01781-w. PubMed PMID:  
314 33935470; PubMed Central PMCID: PMC8064417.
- 315 2. Robertson L, Maposa I, Somaroo H, Johnson O. Mental health of healthcare workers  
316 during the COVID-19 outbreak: A rapid scoping review to inform provincial guidelines in South  
317 Africa. *South African Medical Journal.* 2020;110(10):1010-9.
- 318 3. Gupta S, Sahoo S. Pandemic and mental health of the front-line healthcare workers: a  
319 review and implications in the Indian context amidst COVID-19. *General Psychiatry.* 2020;33(5).
- 320 4. Saragih ID, Tonapa SI, Saragih IS, Advani S, Batubara SO, Suarilah I, et al. Global  
321 Prevalence of Mental Health Problems among healthcare workers during The Covid-19 Pandemic:  
322 A Systematic Review and Meta-Analysis. *International Journal of Nursing Studies.* 2021:104002.
- 323 5. Ayanore MA, Amuna N, Aviisah M, Awolu A, Kipo-Sunyhzi DD, Mogre V, et al.  
324 Towards resilient health systems in sub-saharan africa: A systematic review of the english  
325 language literature on health workforce, surveillance, and health governance issues for health  
326 systems strengthening. *Annals of global health.* 2019;85(1).
- 327 6. Semo B-w, Frissa SM. The mental health impact of the COVID-19 pandemic: implications  
328 for sub-Saharan Africa. *Psychology Research and Behavior Management.* 2020;13:713.

- 1  
2  
3 329 7. Med S. Serious Health Workforce Shortage in Zambia: *Solidar Med*; 2020 [updated 22  
4 330 December 2020; cited 2022 16 January 2022]. Available from:  
5 331 <https://www.solidarmed.ch/en/news/shortage-skilled-workers-health-system-zambia>.  
6 332 8. Munakampe MN. Strengthening mental health systems in Zambia. *International journal of*  
7 333 *mental health systems*. 2020;14(1):1-9.  
8 334 9. Deng D, Naslund JA. Psychological impact of COVID-19 Pandemic on frontline health  
9 335 workers in low-and middle-income countries. *Harvard public health review (Cambridge, Mass)*.  
10 336 2020;28.  
11 337 10. Moitra M, Rahman M, Collins PY, Gohar F, Weaver M, Kinuthia J, et al. Mental health  
12 338 consequences for healthcare workers during the COVID-19 pandemic: a scoping review to draw  
13 339 lessons for LMICs. *Frontiers in psychiatry*. 2021;12:22.  
14 340 11. Ceri V, Cicek I. Psychological Well-Being, Depression and Stress During COVID-19  
15 341 Pandemic in Turkey: A Comparative Study of Healthcare Professionals and Non-Healthcare  
16 342 Professionals. *Psychology, health & medicine*. 2021;26(1):85-97. Epub 2020/12/16. doi:  
17 343 10.1080/13548506.2020.1859566. PubMed PMID: 33320723.  
18 344 12. Shah J, Monroe-Wise A, Talib Z, Nabiswa A, Said M, Abeid A, et al. Mental health  
19 345 disorders among healthcare workers during the COVID-19 pandemic: a cross-sectional survey  
20 346 from three major hospitals in Kenya. *BMJ open*. 2021;11(6):e050316.  
21 347 13. Chersich MF, Gray G, Fairlie L, Eichbaum Q, Mayhew S, Allwood B, et al. COVID-19 in  
22 348 Africa: care and protection for frontline healthcare workers. *Global Health*. 2020;16(1):46. Epub  
23 349 2020/05/18. doi: 10.1186/s12992-020-00574-3. PubMed PMID: 32414379; PubMed Central  
24 350 PMCID: PMC7227172.  
25 351 14. Yitayih Y, Mekonen S, Zeynudin A, Mengistie E, Ambelu A. Mental health of healthcare  
26 352 professionals during the early stage of the COVID-19 pandemic in Ethiopia. *BJPsych Open*.  
27 353 2020;7(1):e1. Epub 2020/12/02. doi: 10.1192/bjo.2020.130. PubMed PMID: 33256883; PubMed  
28 354 Central PMCID: PMC7844150.  
29 355 15. Jemal K, Deriba BS, Geleta TA, Tesema M, Awol M, Mengistu E, et al. Self-Reported  
30 356 Symptoms of Depression, Anxiety, and Stress Among Healthcare Workers in Ethiopia During the  
31 357 COVID-19 Pandemic: A Cross-Sectional Study. *Neuropsychiatr Dis Treat*. 2021;17:1363-73.  
32 358 Epub 2021/05/15. doi: 10.2147/NDT.S306240. PubMed PMID: 33986596; PubMed Central  
33 359 PMCID: PMC78110274.  
34 360 16. Asnakew S, Amha H, Kassew T. Mental Health Adverse Effects of COVID-19 Pandemic  
35 361 on Health Care Workers in North West Ethiopia: A Multicenter Cross-Sectional Study.  
36 362 *Neuropsychiatr Dis Treat*. 2021;17:1375-84. Epub 2021/05/18. doi: 10.2147/NDT.S306300.  
37 363 PubMed PMID: 33994787; PubMed Central PMCID: PMC78113010.  
38 364 17. Sahebi A, Nejati-Zarnaqi B, Moayedi S, Yousefi K, Torres M, Golitaleb M. The prevalence  
39 365 of anxiety and depression among healthcare workers during the COVID-19 pandemic: An  
40 366 umbrella review of meta-analyses. *Prog Neuropsychopharmacol Biol Psychiatry*.  
41 367 2021;107:110247. Epub 2021/01/22. doi: 10.1016/j.pnpbp.2021.110247. PubMed PMID:  
42 368 33476692; PubMed Central PMCID: PMC7817526.  
43 369 18. Elbay RY, Kurtulmuş A, Arpacioğlu S, Karadere E. Depression, anxiety, stress levels of  
44 370 physicians and associated factors in Covid-19 pandemics. *Psychiatry research*. 2020;290:113130.  
45 371 19. Kroenke K, Spitzer RL, Williams JB. The PHQ-9: validity of a brief depression severity  
46 372 measure. *Journal of general internal medicine*. 2001;16(9):606-13. doi: 10.1046/j.1525-  
47 373 1497.2001.016009606.x. PubMed PMID: 11556941.

- 1  
2  
3 374 20. Kroenke K, Spitzer RL, Williams JB. The PHQ-9: validity of a brief depression severity  
4 375 measure. *Journal of general internal medicine*. 2001;16(9):606-13.
- 5 376 21. Kroenke K, Spitzer RL, Williams JB, Löwe B. The patient health questionnaire somatic,  
6 377 anxiety, and depressive symptom scales: a systematic review. *General hospital psychiatry*.  
7 378 2010;32(4):345-59.
- 8 379 22. Sawka KS, Mbewe C, Josephat D, Ngulube E. The Senga of Zambia: Linguistic Survey  
9 380 Report with Recommendations for Literature Development Strategy. SIL International: 2021.
- 10 381 23. Beres LK, Simbeza S, Holmes CB, Mwamba C, Mukamba N, Sharma A, et al. Human-  
11 382 centered design lessons for implementation science: improving the implementation of a patient-  
12 383 centered care intervention. *Journal of acquired immune deficiency syndromes (1999)*.  
13 384 2019;82(3):S230.
- 14 385 24. Mody A, Tram KH, Glidden DV, Eshun-Wilson I, Sikombe K, Mehrotra M, et al. Novel  
15 386 Longitudinal Methods for Assessing Retention in Care: a Synthetic Review. *Current HIV/AIDS*  
16 387 *Reports*. 2021;18(4):299-308.
- 17 388 25. Sikombe K, Mody A, Kadota J, Pry JJ, Simbeza S, Eshun-Wilson I, et al. Understanding  
18 389 patient transfers across multiple clinics in Zambia among HIV infected adults. *PloS one*.  
19 390 2020;15(11):e0241477.
- 20 391 26. Holmes CB, Sanne I. Changing models of care to improve progression through the HIV  
21 392 treatment cascade in different populations. *Current Opinion in HIV and AIDS*. 2015;10(6):447-  
22 393 50.
- 23 394 27. Holmes CB, Sikazwe I, Sikombe K, Eshun-Wilson I, Czaicki N, Beres LK, et al. Estimated  
24 395 mortality on HIV treatment among active patients and patients lost to follow-up in 4 provinces of  
25 396 Zambia: Findings from a multistage sampling-based survey. *PLoS Med*. 2018;15(1):e1002489.  
26 397 Epub 2018/01/13. doi: 10.1371/journal.pmed.1002489. PubMed PMID: 29329301; PubMed  
27 398 Central PMCID: PMC5766235.
- 28 399 28. Roy M, Czaicki N, Holmes C, Chavan S, Tsitsi A, Odeny T, et al. Understanding Sustained  
29 400 Retention in HIV/AIDS Care and Treatment: a Synthetic Review. *Current HIV/AIDS Reports*.  
30 401 2016:1-9.
- 31 402 29. Mwamba C, Sharma A, Mukamba N, Beres L, Geng E, Holmes CB, et al. 'They care  
32 403 rudely!': resourcing and relational health system factors that influence retention in care for people  
33 404 living with HIV in Zambia. *BMJ Glob Health*. 2018;3(5):e001007. Epub 2018/11/30. doi:  
34 405 10.1136/bmjgh-2018-001007. PubMed PMID: 30483408; PubMed Central PMCID:  
35 406 PMCPMC6231098.
- 36 407 30. Li Y, Scherer N, Felix L, Kuper H. Prevalence of depression, anxiety and post-traumatic  
37 408 stress disorder in health care workers during the COVID-19 pandemic: A systematic review and  
38 409 meta-analysis. *PloS one*. 2021;16(3):e0246454.
- 39 410 31. Mulatu HA, Tesfaye M, Woldeyes E, Bayisa T, Fisseha H, Kassu RA. The prevalence of  
40 411 common mental disorders among healthcare professionals during the COVID-19 pandemic at a  
41 412 tertiary Hospital in Addis Ababa, Ethiopia. *Journal of Affective Disorders Reports*.  
42 413 2021;6:100246. doi: <https://doi.org/10.1016/j.jadr.2021.100246>.
- 43 414 32. Mokhtari R, Moayedi S, Golitaleb M. COVID-19 pandemic and health anxiety among  
44 415 nurses of intensive care units. *International journal of mental health nursing*. 2020;29(6):1275.
- 45 416 33. Pfefferbaum B, North CS. Mental health and the Covid-19 pandemic. *New England Journal*  
46 417 *of Medicine*. 2020;383(6):510-2.
- 47 418 34. Yıldırım M, Çiçek İ. Optimism and pessimism mediate the association between parental  
48 419 coronavirus anxiety and depression among healthcare professionals in the era of COVID-19.

- 1  
2  
3 420 Psychology, health & medicine. 2022;27(9):1898-906. Epub 2021/08/13. doi:  
4 421 10.1080/13548506.2021.1966702. PubMed PMID: 34382894.
- 5 422 35. Saasa Y. An Assessment on the Role of Human Rights and Governance in Health Service  
6 423 Delivery 2019.
- 7 424 36. Kola L, Kohrt BA, Hanlon C, Naslund JA, Sikander S, Balaji M, et al. COVID-19 mental  
8 425 health impact and responses in low-income and middle-income countries: reimagining global  
9 426 mental health. *The Lancet Psychiatry*. 2021;8(6):535-50. doi: [https://doi.org/10.1016/S2215-](https://doi.org/10.1016/S2215-0366(21)00025-0)  
10 427 [0366\(21\)00025-0](https://doi.org/10.1016/S2215-0366(21)00025-0).
- 11 428 37. Abraham A, Chaabna K, Doraiswamy S, Bhagat S, Sheikh J, Mamtani R, et al. Depression  
12 429 among healthcare workers in the Eastern Mediterranean Region: a systematic review and meta-  
13 430 analysis. *Human resources for health*. 2021;19(1):1-18.
- 14 431 38. Wallén A, Eberhard S, Landgren K. The Experiences of Counsellors Offering Problem-  
15 432 Solving Therapy for Common Mental Health Issues at the Youth Friendship Bench in Zimbabwe.  
16 433 *Issues in Mental Health Nursing*. 2021;42(9):808-17. doi: 10.1080/01612840.2021.1879977.
- 17 434 39. Osei E, Mashamba-Thompson TP. Mobile health applications for disease screening and  
18 435 treatment support in low-and middle-income countries: A narrative review. *Heliyon*.  
19 436 2021;7(3):e06639. Epub 2021/04/20. doi: 10.1016/j.heliyon.2021.e06639. PubMed PMID:  
20 437 33869857; PubMed Central PMCID: PMC8035664.
- 21 438 40. Mutimushi PM, Mupenda BM, Manda PM, Nankonde N, Banda B, Mung'omba K, et al.  
22 439 ZICTA 2019 Annual Report.  
23 440 [https://www.zicta.zm/storage/posts/attachments/oiBT4oMnpJoN3dgHKpvByoDmNXq5ZDYtp3](https://www.zicta.zm/storage/posts/attachments/oiBT4oMnpJoN3dgHKpvByoDmNXq5ZDYtp3sxVYM3.pdf)  
24 441 [sxVYM3.pdf](https://www.zicta.zm/storage/posts/attachments/oiBT4oMnpJoN3dgHKpvByoDmNXq5ZDYtp3sxVYM3.pdf): Zambia Information and Communications Technology Authority (ZICTA), 2019.
- 25 442 41. Chibanda D, Mesu P, Kajawu L, Cowan F, Araya R, Abas MA. Problem-solving therapy  
26 443 for depression and common mental disorders in Zimbabwe: piloting a task-shifting primary mental  
27 444 health care intervention in a population with a high prevalence of people living with HIV. *BMC*  
28 445 *public health*. 2011;11(1):1-10.
- 29 446 42. Patel V, Simon G, Chowdhary N, Kaaya S, Araya R. Packages of care for depression in  
30 447 low-and middle-income countries. *PLoS medicine*. 2009;6(10):e1000159.
- 31  
32  
33  
34  
35  
36

### 449 Supplement:

450  
451 Figure S1: Histogram of total PHQ-9 scores among study participants  
452

A

Page 19 of 22



B

BMJ Open

Facility size (categorically)

Small

Medium

Large

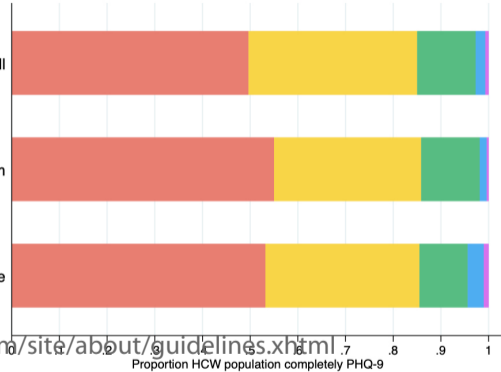

Minimal Mild Moderate Moderate-Severe Severe





STROBE Statement—Checklist of items that should be included in reports of *cohort studies*

|                              | Item No | Recommendation                                                                                                                                                                                    | Page No |
|------------------------------|---------|---------------------------------------------------------------------------------------------------------------------------------------------------------------------------------------------------|---------|
| <b>Title and abstract</b>    | 1       | (a) Indicate the study's design with a commonly used term in the title or the abstract                                                                                                            | 2       |
|                              |         | (b) Provide in the abstract an informative and balanced summary of what was done and what was found                                                                                               | 2       |
| <b>Introduction</b>          |         |                                                                                                                                                                                                   |         |
| Background/rationale         | 2       | Explain the scientific background and rationale for the investigation being reported                                                                                                              | 4       |
| Objectives                   | 3       | State specific objectives, including any prespecified hypotheses                                                                                                                                  | 4, 5    |
| <b>Methods</b>               |         |                                                                                                                                                                                                   |         |
| Study design                 | 4       | Present key elements of study design early in the paper                                                                                                                                           | 5       |
| Setting                      | 5       | Describe the setting, locations, and relevant dates, including periods of recruitment, exposure, follow-up, and data collection                                                                   | 5       |
| Participants                 | 6       | (a) Give the eligibility criteria, and the sources and methods of selection of participants. Describe methods of follow-up                                                                        | 5, 6    |
|                              |         | (b) For matched studies, give matching criteria and number of exposed and unexposed                                                                                                               | NA      |
| Variables                    | 7       | Clearly define all outcomes, exposures, predictors, potential confounders, and effect modifiers. Give diagnostic criteria, if applicable                                                          | 5, 6    |
| Data sources/<br>measurement | 8*      | For each variable of interest, give sources of data and details of methods of assessment (measurement). Describe comparability of assessment methods if there is more than one group              | 5, 6    |
| Bias                         | 9       | Describe any efforts to address potential sources of bias                                                                                                                                         | 5, 6    |
| Study size                   | 10      | Explain how the study size was arrived at                                                                                                                                                         | 5       |
| Quantitative variables       | 11      | Explain how quantitative variables were handled in the analyses. If applicable, describe which groupings were chosen and why                                                                      | 5, 6    |
| Statistical methods          | 12      | (a) Describe all statistical methods, including those used to control for confounding                                                                                                             | 6       |
|                              |         | (b) Describe any methods used to examine subgroups and interactions                                                                                                                               | 6       |
|                              |         | (c) Explain how missing data were addressed                                                                                                                                                       | 6       |
|                              |         | (d) If applicable, explain how loss to follow-up was addressed                                                                                                                                    | NA      |
|                              |         | (e) Describe any sensitivity analyses                                                                                                                                                             | 6       |
| <b>Results</b>               |         |                                                                                                                                                                                                   |         |
| Participants                 | 13*     | (a) Report numbers of individuals at each stage of study—eg numbers potentially eligible, examined for eligibility, confirmed eligible, included in the study, completing follow-up, and analysed | 7, 8    |
|                              |         | (b) Give reasons for non-participation at each stage                                                                                                                                              | NA      |
|                              |         | (c) Consider use of a flow diagram                                                                                                                                                                | NA      |
| Descriptive data             | 14*     | (a) Give characteristics of study participants (eg demographic, clinical, social) and information on exposures and potential confounders                                                          | 7, 8    |
|                              |         | (b) Indicate number of participants with missing data for each variable of interest                                                                                                               | 7, 8    |
|                              |         | (c) Summarise follow-up time (eg, average and total amount)                                                                                                                                       | NA      |
| Outcome data                 | 15*     | Report numbers of outcome events or summary measures over time                                                                                                                                    | 7, 8    |



|    |                          |    |                                                                                                                                                                                                              |        |
|----|--------------------------|----|--------------------------------------------------------------------------------------------------------------------------------------------------------------------------------------------------------------|--------|
| 1  | Main results             | 16 | (a) Give unadjusted estimates and, if applicable, confounder-adjusted estimates and their precision (eg, 95% confidence interval). Make clear which confounders were adjusted for and why they were included | 7, 8   |
| 2  |                          |    | (b) Report category boundaries when continuous variables were categorized                                                                                                                                    | 7, 8   |
| 3  |                          |    | (c) If relevant, consider translating estimates of relative risk into absolute risk for a meaningful time period                                                                                             | NA     |
| 4  |                          |    |                                                                                                                                                                                                              |        |
| 5  | Other analyses           | 17 | Report other analyses done—eg analyses of subgroups and interactions, and sensitivity analyses                                                                                                               | 9      |
| 6  |                          |    |                                                                                                                                                                                                              |        |
| 7  |                          |    |                                                                                                                                                                                                              |        |
| 8  |                          |    |                                                                                                                                                                                                              |        |
| 9  |                          |    |                                                                                                                                                                                                              |        |
| 10 |                          |    |                                                                                                                                                                                                              |        |
| 11 | <b>Discussion</b>        |    |                                                                                                                                                                                                              |        |
| 12 | Key results              | 18 | Summarise key results with reference to study objectives                                                                                                                                                     | 10     |
| 13 | Limitations              | 19 | Discuss limitations of the study, taking into account sources of potential bias or imprecision. Discuss both direction and magnitude of any potential bias                                                   | 11, 12 |
| 14 | Interpretation           | 20 | Give a cautious overall interpretation of results considering objectives, limitations, multiplicity of analyses, results from similar studies, and other relevant evidence                                   | 9, 10  |
| 15 | Generalisability         | 21 | Discuss the generalisability (external validity) of the study results                                                                                                                                        | 9, 10  |
| 16 |                          |    |                                                                                                                                                                                                              |        |
| 17 | <b>Other information</b> |    |                                                                                                                                                                                                              |        |
| 18 | Funding                  | 22 | Give the source of funding and the role of the funders for the present study and, if applicable, for the original study on which the present article is based                                                | 13, 14 |
| 19 |                          |    |                                                                                                                                                                                                              |        |
| 20 |                          |    |                                                                                                                                                                                                              |        |
| 21 |                          |    |                                                                                                                                                                                                              |        |
| 22 |                          |    |                                                                                                                                                                                                              |        |
| 23 |                          |    |                                                                                                                                                                                                              |        |
| 24 |                          |    |                                                                                                                                                                                                              |        |
| 25 |                          |    |                                                                                                                                                                                                              |        |
| 26 |                          |    |                                                                                                                                                                                                              |        |
| 27 |                          |    |                                                                                                                                                                                                              |        |
| 28 |                          |    |                                                                                                                                                                                                              |        |
| 29 |                          |    |                                                                                                                                                                                                              |        |
| 30 |                          |    |                                                                                                                                                                                                              |        |
| 31 |                          |    |                                                                                                                                                                                                              |        |
| 32 |                          |    |                                                                                                                                                                                                              |        |
| 33 |                          |    |                                                                                                                                                                                                              |        |
| 34 |                          |    |                                                                                                                                                                                                              |        |
| 35 |                          |    |                                                                                                                                                                                                              |        |
| 36 |                          |    |                                                                                                                                                                                                              |        |
| 37 |                          |    |                                                                                                                                                                                                              |        |
| 38 |                          |    |                                                                                                                                                                                                              |        |
| 39 |                          |    |                                                                                                                                                                                                              |        |
| 40 |                          |    |                                                                                                                                                                                                              |        |
| 41 |                          |    |                                                                                                                                                                                                              |        |
| 42 |                          |    |                                                                                                                                                                                                              |        |
| 43 |                          |    |                                                                                                                                                                                                              |        |
| 44 |                          |    |                                                                                                                                                                                                              |        |
| 45 |                          |    |                                                                                                                                                                                                              |        |
| 46 |                          |    |                                                                                                                                                                                                              |        |
| 47 |                          |    |                                                                                                                                                                                                              |        |
| 48 |                          |    |                                                                                                                                                                                                              |        |
| 49 |                          |    |                                                                                                                                                                                                              |        |
| 50 |                          |    |                                                                                                                                                                                                              |        |
| 51 |                          |    |                                                                                                                                                                                                              |        |
| 52 |                          |    |                                                                                                                                                                                                              |        |
| 53 |                          |    |                                                                                                                                                                                                              |        |
| 54 |                          |    |                                                                                                                                                                                                              |        |
| 55 |                          |    |                                                                                                                                                                                                              |        |
| 56 |                          |    |                                                                                                                                                                                                              |        |
| 57 |                          |    |                                                                                                                                                                                                              |        |
| 58 |                          |    |                                                                                                                                                                                                              |        |
| 59 |                          |    |                                                                                                                                                                                                              |        |
| 60 |                          |    |                                                                                                                                                                                                              |        |

\*Give information separately for exposed and unexposed groups.

**Note:** An Explanation and Elaboration article discusses each checklist item and gives methodological background and published examples of transparent reporting. The STROBE checklist is best used in conjunction with this article (freely available on the Web sites of PLoS Medicine at <http://www.plosmedicine.org/>, Annals of Internal Medicine at <http://www.annals.org/>, and Epidemiology at <http://www.epidem.com/>). Information on the STROBE Initiative is available at <http://www.strobe-statement.org>.

# BMJ Open

## A cross-sectional study to assess depression among health care workers in Lusaka, Zambia during the COVID-19 pandemic

|                                 |                                                                                                                                                                                                                                                                                                                                                                                                                                                                                                                                                                                                                                                                                                                                                                                                                                                                                                                                                                                                                                                                                                                                                                                                                                                                                                                 |
|---------------------------------|-----------------------------------------------------------------------------------------------------------------------------------------------------------------------------------------------------------------------------------------------------------------------------------------------------------------------------------------------------------------------------------------------------------------------------------------------------------------------------------------------------------------------------------------------------------------------------------------------------------------------------------------------------------------------------------------------------------------------------------------------------------------------------------------------------------------------------------------------------------------------------------------------------------------------------------------------------------------------------------------------------------------------------------------------------------------------------------------------------------------------------------------------------------------------------------------------------------------------------------------------------------------------------------------------------------------|
| Journal:                        | <i>BMJ Open</i>                                                                                                                                                                                                                                                                                                                                                                                                                                                                                                                                                                                                                                                                                                                                                                                                                                                                                                                                                                                                                                                                                                                                                                                                                                                                                                 |
| Manuscript ID                   | bmjopen-2022-069257.R2                                                                                                                                                                                                                                                                                                                                                                                                                                                                                                                                                                                                                                                                                                                                                                                                                                                                                                                                                                                                                                                                                                                                                                                                                                                                                          |
| Article Type:                   | Original research                                                                                                                                                                                                                                                                                                                                                                                                                                                                                                                                                                                                                                                                                                                                                                                                                                                                                                                                                                                                                                                                                                                                                                                                                                                                                               |
| Date Submitted by the Author:   | 08-Mar-2023                                                                                                                                                                                                                                                                                                                                                                                                                                                                                                                                                                                                                                                                                                                                                                                                                                                                                                                                                                                                                                                                                                                                                                                                                                                                                                     |
| Complete List of Authors:       | <p>Simbeza, Sandra; Center for Infectious Disease Research in Zambia<br/> Mutale, Jacob; Center for Infectious Disease Research in Zambia, Implementation Science Unit<br/> Mulabe, Musunge; Center for Infectious Disease Research in Zambia<br/> Jere, Lazarus; Center for Infectious Disease Research in Zambia<br/> Bukankala, Chama; Center for Infectious Disease Research in Zambia<br/> Sikombe, Kombatende; Center for Infectious Disease Research in Zambia, Implementation Science Unit, Research department<br/> Sikazwe, Izukanji; Center for Infectious Disease Research in Zambia, Chief Executive Officer<br/> Bolton-Moore, Carolyn; Center for Infectious Disease Research in Zambia; The University of Alabama at Birmingham School of Medicine, Infectious Disease<br/> Mody, Aaloke; Washington University in St Louis, Infectious Diseases<br/> Geng, Elvin; Washington University in St Louis School of Medicine<br/> Sharma, Anjali; Center for Infectious Disease Research in Zambia<br/> Beres, Laura K ; Johns Hopkins University Bloomberg School of Public Health, Department of International Health<br/> Pry, Jake; Center for Infectious Disease Research in Zambia, Implementation Science Unit; University of California Davis School of Medicine, Public Health Sciences</p> |
| <b>Primary Subject Heading</b>: | Mental health                                                                                                                                                                                                                                                                                                                                                                                                                                                                                                                                                                                                                                                                                                                                                                                                                                                                                                                                                                                                                                                                                                                                                                                                                                                                                                   |
| Secondary Subject Heading:      | HIV/AIDS, Health services research, Epidemiology, Global health                                                                                                                                                                                                                                                                                                                                                                                                                                                                                                                                                                                                                                                                                                                                                                                                                                                                                                                                                                                                                                                                                                                                                                                                                                                 |
| Keywords:                       | COVID-19, EPIDEMIOLOGY, HIV & AIDS < INFECTIOUS DISEASES, MENTAL HEALTH                                                                                                                                                                                                                                                                                                                                                                                                                                                                                                                                                                                                                                                                                                                                                                                                                                                                                                                                                                                                                                                                                                                                                                                                                                         |
|                                 |                                                                                                                                                                                                                                                                                                                                                                                                                                                                                                                                                                                                                                                                                                                                                                                                                                                                                                                                                                                                                                                                                                                                                                                                                                                                                                                 |

SCHOLARONE™  
Manuscripts



I, the Submitting Author has the right to grant and does grant on behalf of all authors of the Work (as defined in the below author licence), an exclusive licence and/or a non-exclusive licence for contributions from authors who are: i) UK Crown employees; ii) where BMJ has agreed a CC-BY licence shall apply, and/or iii) in accordance with the terms applicable for US Federal Government officers or employees acting as part of their official duties; on a worldwide, perpetual, irrevocable, royalty-free basis to BMJ Publishing Group Ltd ("BMJ") its licensees and where the relevant Journal is co-owned by BMJ to the co-owners of the Journal, to publish the Work in this journal and any other BMJ products and to exploit all rights, as set out in our [licence](#).

The Submitting Author accepts and understands that any supply made under these terms is made by BMJ to the Submitting Author unless you are acting as an employee on behalf of your employer or a postgraduate student of an affiliated institution which is paying any applicable article publishing charge ("APC") for Open Access articles. Where the Submitting Author wishes to make the Work available on an Open Access basis (and intends to pay the relevant APC), the terms of reuse of such Open Access shall be governed by a Creative Commons licence – details of these licences and which [Creative Commons](#) licence will apply to this Work are set out in our licence referred to above.

Other than as permitted in any relevant BMJ Author's Self Archiving Policies, I confirm this Work has not been accepted for publication elsewhere, is not being considered for publication elsewhere and does not duplicate material already published. I confirm all authors consent to publication of this Work and authorise the granting of this licence.

1  
2  
3 **A cross-sectional study to assess depression among health care workers in Lusaka, Zambia**  
4 **during the COVID-19 pandemic.**  
5  
6  
7

8 Sandra Simbeza<sup>1</sup>, Jacob Mutale<sup>1</sup>, Musunge Mulabe<sup>1</sup>, Lazarus Jere<sup>1</sup>, Chama Bukankala<sup>1</sup>,  
9 Kombatende Sikombe<sup>1</sup>, Izukanji Sikazwe<sup>1</sup>, Carolyn Bolton Moore<sup>1,2</sup>, Aaloke Mody<sup>3</sup>, Elvin H.  
10 Geng<sup>3</sup>, Anjali Sharma<sup>1</sup>, Laura K. Beres<sup>2†</sup>, Jake M. Pry<sup>1,5§†</sup>  
11  
12

13 <sup>1</sup>Centre for infectious Disease Research in Zambia, Lusaka Zambia

14 <sup>2</sup>Division of Infectious Diseases, Department of Internal Medicine, School of Medicine, University  
15 of Alabama, Birmingham AL, USA

16 <sup>3</sup> Department of Internal Medicine School of Medicine, Washington University in St. Louis, MO  
17 USA

18 <sup>4</sup>Department of International Health, Johns Hopkins Bloomberg School of Public Health,  
19 Baltimore, MD USA

20 <sup>5</sup>Department of Public Health Sciences, School of Medicine, University of California, Davis, CA,  
21 USA  
22  
23

24  
25 †Authors contributed equally to manuscript

26  
27 § Corresponding author: Jake M. Pry  
28  
29

30 Jake M. Pry, PhD, MPH  
31 Centre for Infectious Disease Research Zambia  
32 Plot 34620 Danny Pule Road, Mass Media  
33 Lusaka, Zambia 10101  
34 jake.pry@cidrz.org | jmpry@ucdavis.edu  
35 Phone: +1 936 661 6885  
36  
37  
38

39 Keywords: Health Care Workers, Depression, COVID-19, PHQ-9  
40  
41  
42  
43  
44  
45  
46  
47  
48  
49  
50  
51  
52  
53  
54  
55  
56  
57  
58  
59  
60

## **Abstract**

**Objectives:** We sought to assess depression among health care workers (HCWs) in the context of COVID-19 in Lusaka Province, Zambia.

**Design:** This cross-sectional study is nested within a larger study, Person Centered Public Health for HIV Treatment in Zambia (PCPH), a cluster-randomized trial to assess HIV care and outcomes.

**Setting:** The research was conducted in 24 government-run health facilities during 11 August - 15 October 2020 during the first wave of the COVID-19 epidemic in Lusaka, Zambia.

**Participants:** We used convenience sampling to recruit HCW participants who were previously enrolled in the PCPH study, had more than 6 months experience working at the facility and were voluntarily willing to participate.

**Primary outcome measures:** We implemented the well-validated Patient Health Questionnaire (PHQ-9) to assess HCW depression. We used mixed-effects, adjusted Poisson regression to estimate the marginal probability of HCW experiencing depression that may warrant intervention (PHQ-9 score  $\geq 5$ ) by health care facility.

**Results:** We collected PHQ-9 survey responses from 713 professional and lay HCWs. Overall, 334 (46.8%, 95% CI: 43.1, .50.6%) HCWs recorded a PHQ-9 score  $\geq 5$ , indicating the need for further assessment and potential intervention for depression. We identified significant heterogeneity across facilities and observed a greater proportion of HCWs with symptoms of depression in facilities providing COVID-19 testing and treatment services.

**Conclusions:** Depression may be a concern for a large proportion of HCW in Zambia. Further work to understand the magnitude and etiologies of depression amongst HCW in the public sector is needed to design effective preventative and treatment interventions to meet the need for mental health support and to minimize poor health outcomes.

**BMJ Open Questions:***Strengths and Limitations of this study*

- These data represent important insights regarding the state of mental wellness among a large sample of health care workers during a public health crisis in a resource limited setting, where mental wellness, such as depression, is often not measured nor documented.
- We include a large number (N=24) of facilities to appreciate the heterogeneity in symptoms of depression among mental health in the sampled facilities in Lusaka Province of Zambia.
- An important limitation is lack of data on demographics of health care worker respondents due to concern about stigma around mental wellness and potential to identify individuals given inclusion of clinics with small staff.
- Without pre-COVID 19 estimates of depression among health care workers in Lusaka, we are not able to show association between mild-severe depression with the pandemic; however, we show that during the pandemic that depression was high and attention to this population is justified to ensure a healthy HCW workforce.
- We employed convenience sampling in selecting participants which may limit representativeness of study results to the wider population of HCWs.

## 48 Introduction

49 Coronavirus disease 2019 (COVID-19) has caused substantial global health hardship and health  
50 care workers (HCWs) position on the frontlines of the public health response places them at great  
51 risk for negative effects on health and wellbeing[1,[1]. In addition to excess occupational hazard  
52 of contracting COVID-19, their experience as care givers increases their risk of developing mental  
53 health disorders such as anxiety, depression, trauma, insomnia, and stress, which may lead to poor  
54 physical and psychological wellbeing [2]. A healthy workforce is critical to effectively managing  
55 and mitigating COVID-19, as well as providing continuity of high-quality care for other chronic  
56 and acute health conditions [3, 4]. Even prior to COVID-19, countries in sub-Saharan Africa faced  
57 limited medical infrastructure, supplies, and an over-burdened workforce, which challenged HCW  
58 wellbeing and the provision of quality health care [5, 6]. These challenges, along with pandemic-  
59 sensitive barriers such as limited access to personal protective equipment (PPE) further  
60 exacerbated HCW stress and vulnerability. While HCWs in resource limited settings have  
61 demonstrated resilience, poor mental health is likely to compromise their ability to make decisions,  
62 as well as impact patient interactions [7]. Mental health services, like other health resources, are  
63 limited, with few trained mental health providers[8]. Understanding mental health and wellbeing  
64 among HCWs can catalyze interventions to provide treatment and improve the health care facility  
65 environment for the HCWs and patients [8].

66  
67 Several studies have been conducted to assess mental wellness impact of the pandemic amongst  
68 HCWs however, the majority of these studies focus on the continent of Asia and very little data is  
69 available for HCWs in Africa [9-11]. Limited data from Kenya and Ethiopia provides evidence  
70 that the prevalence of mental disorders such as depression, insomnia and stress were higher among  
71 those HCWs caring for patients with COVID-19, or in areas of higher infection prevalence  
72 compared to those working with non-COVID-19 patients or less [2, 12-16]. The most prevalent  
73 reported mental health conditions among health care workers are depression, insomnia, and  
74 anxiety [17]. Characterization of the state of mental wellness during the COVID-19 pandemic in  
75 Sub-Saharan African countries among HCWs, specifically in Zambia remains incomplete [12, 18].

76  
77 As part of a larger patient-centered care study, we collected facility-level measures to understand  
78 the context of care at 24 study sites. As a part of establishing care context we assessed mental

1  
2  
3 79 health, specifically depression, using the nine item Patient Health Questionnaire (PHQ-9) in the  
4 80 context of COVID-19 among HCWs in Lusaka Province, Zambia from 11 August 2020 to 15  
5 81 October 2020 [19].  
6  
7  
8  
9

## 10 83 **Methods**

### 11 84 *Setting*

12 85 This cross-sectional study of HCW depression is nested within a larger study, Person Centered  
13 86 Public Health for HIV Treatment in Zambia (PCPH), a cluster-randomized trial to assess HIV care  
14 87 and outcomes running from August 2018 to November 2021 across 24 government-funded health  
15 88 facilities in Lusaka Province (Pan African Clinical Trial Registry number:  
16 89 PACTR202101847907585). All PHQ-9 responses were collected between 11 August 2020 and 15  
17 90 October 2020 among participating facilities that offered HIV care services and varied in size and  
18 91 location. Facilities were assigned codes to protect the identity of the HCW participants.  
19  
20  
21  
22  
23  
24  
25  
26

### 27 93 *Study Population*

28 94 We developed a cohort of HCWs that primarily provide HIV care at one of the 24 health facilities  
29 95 in the PCPH study. This was done by compiling all HCW's contact details from the HCWs who  
30 96 had, at the time of the introduction of the depression study, participated in the HCW survey  
31 97 component of the original PCPH study. The PCPH sample was comprised of both professional  
32 98 HCWs including nurses, pharmacists, midwives, medical doctors, radiographers, and lay HCWS  
33 99 including treatment supporters and general workers. To augment participation in the PHQ-9 data  
34 100 collection, we expanded the PHQ-9 sample to include any HCW willing to participate and had  $\geq 6$   
35 101 months working experience at the study facility. We informed the facility in-charge of the PHQ-9  
36 102 study opportunity who communicated it to staff members.  
37  
38  
39  
40  
41  
42  
43  
44  
45

### 46 104 *Measurements*

47 105 Trained study research assistants visited health care facilities and discussed the study opportunity  
48 106 in-person with available staff members. Those who expressed interest were screened for eligibility,  
49 107 offered the opportunity to verbally consent and with immediate participation. As a part of the  
50 108 PCPH adaptation to the COVID-19 pandemic, we implemented the nine-question Patient Health  
51 109 Questionnaire (PHQ-9) to screen for presence and severity of depression. The PHQ-9 has been  
52  
53  
54  
55  
56  
57  
58  
59  
60



1  
2  
3 110 previously used in Zambia to screen for likelihood of depression [20], and has been validated in  
4 111 Tanzania and South Africa which are similar settings as Zambia [20, 21]. The PHQ-9 instrument  
5 112 was translated from English into Nyanja and Bemba, the most commonly spoken Zambian  
6 113 languages in Lusaka Province, where the survey was conducted [22]. Depending on the participant  
7 114 preference, the standard PHQ-9 survey was self-administered on paper or surveyor-administered  
8 115 by trained study research assistants in the participant's preferred language. Potentially identifying  
9 116 information such as age, sex, and HCW cadre were not collected from respondents to protect  
10 117 privacy. Facility populations were categorized as small (<40,000 clients/year), medium (40,000-  
11 118 99,999 visits/year), and large ( $\geq 100,000$  visits/year) as recorded in 2019.  
12  
13  
14  
15  
16  
17  
18  
19

119

### 120 *Analysis*

121 We followed the standard, 27-point scoring system for the PHQ-9 to identify participants with  
122 scores consistent with minimal (0-4), mild (5-9), moderate (10-14), moderately severe (15-19),  
123 and severe depression (20-27) [19]. Our main outcome was mild depression or greater (PHQ-9  
124 score  $\geq 5$ ) as this level of depression warrants additional clinical follow-up [19]. We developed  
125 frequency tables and used a bar graphs to illustrate the distribution of PHQ-9 scores by health care  
126 facility. We developed scatter plots of adjusted marginal probability with 95% confidence intervals  
127 to illustrate the probability that a HCW will have a PHQ-9 score  $\geq 5$  by health care facility. We  
128 used mixed effects Poisson regression to estimate prevalence ratios for those with mild depression  
129 allowing random effects at the facility level and measured fixed effects for month of survey and  
130 clinic size category. Facilities were categorized by client population estimates as: small (<40,000  
131 clients), medium (40,000-100,000 clients), and large (>100,000 clients).  
132

132

### 133 *Patient and Public Involvement*

134 The parent study, focused primarily on improving the patient experience at routine clinic visits  
135 through HCW training, mentorship, and audit and feedback The research approach and content is  
136 based on participatory research with HCWs, human-centered design workshops, and stakeholder  
137 collaborations [23-29]. This research guided us to include measures of HCW satisfaction and  
138 wellbeing. In addition to a HCW experience measure throughout PCPH, the advent of COVID-19  
139 led us to include an assessment of HCW depression. Patients were not directly involved in the  
140 design, nor the recruitment of this sub-study assessing the depression levels of HCWs. The

141 findings of this study as well as the parent study will be shared with the Zambian Ministry of  
 142 Health as well as the study facilities.

143

#### 144 *Ethics*

145 This study was approved as part of the larger PCPH study by the University of Zambia Biomedical  
 146 Ethics Committee and the University of Alabama at Birmingham Institution Review Board, and  
 147 the National Health Research Authority in Zambia. We obtained waiver of written informed  
 148 consent and obtained verbal consent from participants prior to administering the survey.

149

#### 150 **Results**

151 A total of 713 HCWs from 24 facilities across Lusaka and Chongwe districts in the Lusaka  
 152 Province were included in the analysis dataset (**Table 1**). The majority (69.6%) of the PHQ-9  
 153 survey responses were collected in September 2020 (**Table 1**). The largest proportion of the  
 154 responses were collected at facilities serving a large client population (41.7%) followed closely by  
 155 facilities serving a medium-sized client population (37.7%) (**Table 1**). Responses for PHQ-9  
 156 questions were largely complete with <1% responses missing.

157

158 **Table 1: Participant characteristics**

| Factor   | Level | n (%)    |
|----------|-------|----------|
| N        |       | 713      |
| Facility | 1     | 30 (4.2) |
|          | 2     | 30 (4.2) |
|          | 3     | 30 (4.2) |
|          | 4     | 30 (4.2) |
|          | 5     | 30 (4.2) |
|          | 6     | 30 (4.2) |
|          | 7     | 30 (4.2) |
|          | 8     | 30 (4.2) |
|          | 9     | 30 (4.2) |
|          | 10    | 30 (4.2) |
|          | 11    | 30 (4.2) |
|          | 12    | 27 (3.8) |
|          | 13    | 27 (3.8) |

|                              |                |            |
|------------------------------|----------------|------------|
|                              | 14             | 30 (4.2)   |
|                              | 15             | 30 (4.2)   |
|                              | 16             | 30 (4.2)   |
|                              | 17             | 30 (4.2)   |
|                              | 18             | 30 (4.2)   |
|                              | 19             | 30 (4.2)   |
|                              | 20             | 30 (4.2)   |
|                              | 21             | 30 (4.2)   |
|                              | 22             | 30 (4.2)   |
|                              | 23             | 29 (4.1)   |
|                              | 24             | 30 (4.2)   |
| Clinic Population (category) | Small          | 147 (20.6) |
|                              | Medium         | 269 (37.7) |
|                              | Large          | 297 (41.7) |
| Month of Survey              | August 2020    | 205 (28.8) |
|                              | September 2020 | 496 (69.6) |
|                              | October 2020   | 12 (1.7)   |

159  
160 Of the 713 responses, 231 (32.4%, 95%CI: 29.0-36.0) reported mild depression (PHQ-9 score 5-  
161 9), 81 (11.4% 95%CI: 9.1-13.9) reported moderate depression (PHQ-9 score 10-14). A total of 81  
162 (11.4) respondents had a PHQ-9 score corresponding to moderate depression across all but one  
163 facility, 17 (2.4%, 95%CI: 1.4-3.8) respondents had PHQ-9 scores consistent with moderately  
164 severe depression across four facilities, and five (0.7%, 95%CI: 0.2-1.6) HCWs had PHQ-9 scores  
165 consistent with severe depression across five different facilities (**Fig 1, Fig S1, Table 2**).

166  
167 **Table 2: Proportion of the analysis population by PHQ-9 score category with 95% confidence**  
168 **intervals (N=713)**

| <i>Variable</i> | <i>n</i> | <i>Proportion (%)</i> | <i>95% CI</i> |
|-----------------|----------|-----------------------|---------------|
| ≥5 PHQ-9 score  | 334      | 46.8                  | (43.1, 50.6)  |
| Mild            | 231      | 32.4                  | (29.0, 36.0)  |
| Moderate        | 81       | 11.4                  | (9.1, 13.9)   |
| Moderate-severe | 17       | 2.4                   | (1.4, 3.8)    |
| Severe          | 5        | 0.7                   | (0.2, 1.6)    |

169 Note: CI – confidence interval; PHQ-9 – nine-item patient health questionnaire.

170

1  
2  
3 171 Though we observed facility-level mental health heterogeneity in the proportion of minimal and  
4  
5 172 mild depression scores across clinics, the proportion of scores consistent with moderate depression  
6  
7  
8 173 remain relatively stable across facilities (**Fig 1**).

9  
10 174  
11 175 **Figure 1: A) Stacked bar chart of proportion population by PHQ-9 score category by**  
12 **health care facility B) Stacked bar chart of proportion population by PHQ-9 score by**  
13 **facility population size category.**  
14 177  
15 178

16 179 Mixed effects adjusted Poisson regression model did not reveal clinic size or month of survey as  
17  
18 180 a significant predictor of PHQ-9 score  $\geq 5$  (**Table 3**).

19  
20  
21 181 **Table 3: Adjusted Poisson regression results (N=713)**

| <i>Covariate</i>                   | <i>level</i> | <i>aPR</i> | <i>95% CI</i> | <i>p-value</i> |
|------------------------------------|--------------|------------|---------------|----------------|
| Clinic<br>Population<br>(category) | small        | 1.12       | (0.95, 1.33)  | 0.170          |
|                                    | medium       | 1.00 (ref) | ref           | ref            |
|                                    | large        | 1.04       | (0.81, 1.33)  | 0.763          |
| Month of<br>Survey                 | August       | 1.00 (ref) | ref           | ref            |
|                                    | September    | 1.14       | (0.94, 1.38)  | 0.193          |
|                                    | October      | 0.98       | (0.54, 1.79)  | 0.945          |

22  
23  
24  
25  
26  
27  
28  
29  
30  
31  
32 182 Note: adjusted for survey week and facility  
33 183

34 184 We illustrate significant heterogeneity in the marginal probability of experiencing greater than  
35  
36 185 minimal depression across facilities (**Fig 2**). Notably, the highest marginal probability of HCWs  
37  
38 186 with PHQ-9 score  $\geq 5$  was observed in a facility serving as a COVID-19 treatment center.  
39  
40 187

41 188 **Figure 2: Marginal probability of health care worker with >minimal depression per PHQ-9**  
42 **score by clinic.**  
43 189  
44  
45 190

46  
47 191 Note: PHQ-9 – nine-item patient health questionnaire.  
48  
49 192

## 50 193 **Discussion**

51  
52 194 We found that a large proportion of the HCW population had a PHQ-9 score  $\geq 5$  indicating a need  
53  
54 195 for follow-up to assess and improve mental wellbeing 46.8% (95% CI: 43.1, 50.6%). Variation in  
55  
56  
57  
58  
59  
60

196 depression outcomes ranged from 82.7% (95% CI: 68.5, 96.9%) at one of the two large COVID-  
197 19 treatment facilities to 28.4% (95% CI: 13.0, 43.9%) at a medium-sized health care facility.

198  
199 Our study shows that HCWs working at the COVID-19 treatment facility had a higher marginal  
200 probability of experiencing mild to moderately severe depression. This is consistent with past  
201 studies showing that frontline HCW working in clinics managing diseases considered to be highly  
202 infectious, such as COVID-19 treatment centers, were more prone to developing depression and  
203 other mental disorders than their counterparts in other departments [12]. In addition, results of our  
204 study demonstrate that HCWs have experienced symptoms of depression during the onset of the  
205 COVID-19 pandemic in Zambia, which is consistent with the findings of similar studies using the  
206 PHQ-9 in other parts of the world where a pooled prevalence of mild depression was found to be  
207 36.1% (95% confidence interval [CI], 31.3%-41.0%) [30]. Studies conducted in Ethiopia among  
208 different cadres of HCWs show that mental disorders which include depression are prevalent  
209 among HCWs during the COVID-19 pandemic, with one study from Ethiopia identifying  
210 approximately 48% prevalence of greater than minimal depression, consistent with our Zambian  
211 estimates [31, 32]. Similarly, globally studies indicate that there is a risk of HCWs experiencing  
212 mental health disorders during the pandemic [4, 30, 31, 33]. The difficult conditions to which  
213 HCWs may be exposed including extended working hours, risk of exposure to the disease,  
214 increased workload, concerns about transmitting the infection to their family members, reduced  
215 social connectedness, and limited resources to care for their patients may amplify poor mental  
216 wellbeing [1, 34-36].

217  
218 Further research is needed to understand heterogeneity in proportions of HCWs with depression.  
219 It may be associated variation in HCW access to resources such as, personal protective equipment  
220 (PPE), hand hygiene station/station supplies at clinic entrance, and knowledge about the COVID-  
221 19 response in Zambia. While the response to the COVID-19 pandemic was standardized, to a  
222 certain extent, by guidance from the provincial and zonal levels, the culture and leadership unique  
223 to each facility might have played a key role in the health care worker experience, contributing to  
224 PHQ-9 score distribution differences across facilities.

225

1  
2  
3 226 As we continue to recognize the mental health services gap across many populations in resource-  
4  
5 227 limited settings we give evidence here to support prioritization of health care workers, especially  
6  
7 228 during public health shocks/emergencies like that presented by COVID-19. Presence of depression  
8  
9 229 among HCWs could lead to poor health outcomes for the HCW workforce and have a sort of  
10  
11 230 “knock-on” effect negatively impacting the quality of care provided to patients [37, 38].  
12  
13 231 Interventions like Friendship Bench piloted in neighboring Zimbabwe designed to encourage  
14  
15 232 positive coping mechanism among HCWs and build a working environment that provides empathy  
16  
17 233 and compassion towards staff may be an efficient option to provide mental wellness support [39,  
18  
19 234 40]. Furthermore, system-based interventions should also be encouraged such as change in  
20  
21 235 working culture and reduction in possible system contributors to HCW stress that could lead to  
22  
23 236 depression. Increasing mobile technology availability may further allow for the use of mobile  
24  
25 237 health (mHealth) based mental wellness services leveraging the framework presented by Osei for  
26  
27 238 low- and middle-income countries [41, 42]. Low-cost intervention packages used for patients can  
28  
29 239 be adapted for HCWs and integrated into system-based interventions. They include routine  
30  
31 240 screening for early detection, mental wellness education, problem solving and use of anti-  
32  
33 241 depressants, cognitive behavior therapy which can be delivered successfully by trained lay HCWs  
34  
35 242 [43, 44].

243

### 244 **Limitations**

36 245 This study had some potential limitations. Firstly, we did not collect participants demographics  
37  
38 246 such as age, sex, marital status, and sex. As such we were not able to adjust for these co- founders.  
39  
40 247 Accounting for these would help make associations in outcomes of depression. Secondly, we  
41  
42 248 employed convenience sampling in selecting participants. This sampling approach may limit  
43  
44 249 representativeness of study the results to the wider population of HCWs. Finally, without pre-  
45  
46 250 COVID 19 estimates of depression among health care workers in Lusaka, we are not able to show  
47  
48 251 association between mild-severe depression with the pandemic however, we show that during the  
49  
50 252 pandemic that depression was high and attention to this population is justified to ensure a healthy  
51  
52 253 HCW workforce. Additionally, though potentially highest than a non-pandemic baseline, these  
53  
54 254 results may be useful as subsequent measures of depression and mental wellness are collected  
55  
56 255 among HCWs.

256

1  
2  
3 **257 Conclusions**  
4

5 258 Depression is a common public health problem; our study demonstrates that HCWs in Zambia  
6  
7 259 may suffer from a high prevalence of depressive symptoms that will require additional clinical  
8  
9 260 follow up. Routine mental health wellness is important to better understand the role that the  
10  
11 261 COVID-19 pandemic may have had on depression among HCWS in Zambia. Furthermore, support  
12  
13 262 for HCW mental wellness can serve to accelerate destigmatizing mental health issues and improve  
14  
15 263 the quality of care provided across health care centers in Zambia.  
16  
17 264  
18  
19  
20  
21  
22  
23  
24  
25  
26  
27  
28  
29  
30  
31  
32  
33  
34  
35  
36  
37  
38  
39  
40  
41  
42  
43  
44  
45  
46  
47  
48  
49  
50  
51  
52  
53  
54  
55  
56  
57  
58  
59  
60

For peer review only

## 266 **Contributorship**

267 SS: data collection, data Framing, and manuscript writing, JM, KS, and MM: data collection and  
268 data curation, LJ and CB: data framing, IS, CBM and EHG: conceptualization, AM: manuscript  
269 review/editing, AS: conceptualization and manuscript review/editing LKB: conceptualization,  
270 data analysis, data framing, and manuscript writing, JMP: data analysis lead, data framing, and  
271 manuscript writing. The corresponding author attests that all listed authors meet authorship criteria  
272 and that no others meeting the criteria have been omitted.

273

## 274 **Funding**

275 Research reported in this publication was supported by the Bill & Melinda Gates Foundation grant  
276 number OPP1166485, the National Institute of Mental Health of the National Institutes of Health  
277 under award number F31MH109378 (L.K.B.), and the National Institute of Allergy and Infectious  
278 Diseases of the National Institutes of Health under award number K24 AI134413 (E.G.).

279

## 280 **Competing of Interests**

281 None

282

## 283 **Ethical Approval**

284 This study was approved as part of the larger PCPH study by the University of Zambia Biomedical  
285 Ethics Committee and the University of Alabama at Birmingham Institution Review Board, and  
286 the National Health Research Authority in Zambia. We obtained waiver of written informed  
287 consent and obtained verbal consent from participants prior to administering the survey.

288

## 289 **Data Sharing**

290 Extra data can be accessed via the Dryad data repository at <http://datadryad.org/> with the doi:  
291 <https://doi.org/10.25338/B8S646>

292

## 293 **Acknowledgements**

294 We would like to thank the Zambian Ministry of Health for their leadership to ensure those in  
295 care continue to receive life-saving HIV treatment. We would also like to thank the health care



workers for their participation in the PHQ-9 assessment as well as their faithful delivery of care to patients in the face of the many challenges presented by the COVID-19 pandemic. To the clients seen at our study facilities we would like to extend sincere thanks for your cooperation and patience.

300

### 301 **List of abbreviations** [Optional]

302 ART: antiretroviral therapy

303 CI- Confidence Interval

304 COVID-19: Coronavirus Disease 2019

305 HCW: Health Care Worker

306 PCPH: Person- Centered Public Health for HIV Treatment in Zambia

307 PHQ-9: Patient Health Questionnaire 9

308

### 309 **Data Sharing**

310 Data used for this analysis is available through Dryad data repository (doi:10.25338/B8S646)

311

### 312 **References**

- 313 1. Yıldırım M, Çiçek İ, Şanlı ME. Coronavirus stress and COVID-19 burnout among  
314 healthcare staffs: The mediating role of optimism and social connectedness. *Curr Psychol.*  
315 2021;40(11):5763-71. Epub 2021/05/04. doi: 10.1007/s12144-021-01781-w. PubMed PMID:  
316 33935470; PubMed Central PMCID: PMC8064417.
- 317 2. Robertson L, Maposa I, Somaroo H, Johnson O. Mental health of healthcare workers  
318 during the COVID-19 outbreak: A rapid scoping review to inform provincial guidelines in South  
319 Africa. *South African Medical Journal.* 2020;110(10):1010-9.
- 320 3. Gupta S, Sahoo S. Pandemic and mental health of the front-line healthcare workers: a  
321 review and implications in the Indian context amidst COVID-19. *General Psychiatry.* 2020;33(5).
- 322 4. Saragih ID, Tonapa SI, Saragih IS, Advani S, Batubara SO, Suarilah I, et al. Global  
323 Prevalence of Mental Health Problems among healthcare workers during The Covid-19 Pandemic:  
324 A Systematic Review and Meta-Analysis. *International Journal of Nursing Studies.* 2021:104002.
- 325 5. Ayanore MA, Amuna N, Aviisah M, Awolu A, Kipo-Sunyhzi DD, Mogre V, et al.  
326 Towards resilient health systems in sub-saharan africa: A systematic review of the english  
327 language literature on health workforce, surveillance, and health governance issues for health  
328 systems strengthening. *Annals of global health.* 2019;85(1).
- 329 6. Semo B-w, Frissa SM. The mental health impact of the COVID-19 pandemic: implications  
330 for sub-Saharan Africa. *Psychology Research and Behavior Management.* 2020;13:713.

- 331 7. Med S. Serious Health Workforce Shortage in Zambia: *Solidar Med*; 2020 [updated 22  
332 December 2020; cited 2022 16 January 2022]. Available from:  
333 <https://www.solidarmed.ch/en/news/shortage-skilled-workers-health-system-zambia>.
- 334 8. Munakampe MN. Strengthening mental health systems in Zambia. *International journal of*  
335 *mental health systems*. 2020;14(1):1-9.
- 336 9. Deng D, Naslund JA. Psychological impact of COVID-19 Pandemic on frontline health  
337 workers in low-and middle-income countries. *Harvard public health review (Cambridge, Mass)*.  
338 2020;28.
- 339 10. Moitra M, Rahman M, Collins PY, Gohar F, Weaver M, Kinuthia J, et al. Mental health  
340 consequences for healthcare workers during the COVID-19 pandemic: a scoping review to draw  
341 lessons for LMICs. *Frontiers in psychiatry*. 2021;12:22.
- 342 11. Ceri V, Cicek I. Psychological Well-Being, Depression and Stress During COVID-19  
343 Pandemic in Turkey: A Comparative Study of Healthcare Professionals and Non-Healthcare  
344 Professionals. *Psychology, health & medicine*. 2021;26(1):85-97. Epub 2020/12/16. doi:  
345 10.1080/13548506.2020.1859566. PubMed PMID: 33320723.
- 346 12. Shah J, Monroe-Wise A, Talib Z, Nabiswa A, Said M, Abeid A, et al. Mental health  
347 disorders among healthcare workers during the COVID-19 pandemic: a cross-sectional survey  
348 from three major hospitals in Kenya. *BMJ open*. 2021;11(6):e050316.
- 349 13. Chersich MF, Gray G, Fairlie L, Eichbaum Q, Mayhew S, Allwood B, et al. COVID-19 in  
350 Africa: care and protection for frontline healthcare workers. *Global Health*. 2020;16(1):46. Epub  
351 2020/05/18. doi: 10.1186/s12992-020-00574-3. PubMed PMID: 32414379; PubMed Central  
352 PMCID: PMC7227172.
- 353 14. Yitayih Y, Mekonen S, Zeynudin A, Mengistie E, Ambelu A. Mental health of healthcare  
354 professionals during the early stage of the COVID-19 pandemic in Ethiopia. *BJPsych Open*.  
355 2020;7(1):e1. Epub 2020/12/02. doi: 10.1192/bjo.2020.130. PubMed PMID: 33256883; PubMed  
356 Central PMCID: PMC7844150.
- 357 15. Jemal K, Deriba BS, Geleta TA, Tesema M, Awol M, Mengistu E, et al. Self-Reported  
358 Symptoms of Depression, Anxiety, and Stress Among Healthcare Workers in Ethiopia During the  
359 COVID-19 Pandemic: A Cross-Sectional Study. *Neuropsychiatr Dis Treat*. 2021;17:1363-73.  
360 Epub 2021/05/15. doi: 10.2147/NDT.S306240. PubMed PMID: 33986596; PubMed Central  
361 PMCID: PMC78110274.
- 362 16. Asnakew S, Amha H, Kassew T. Mental Health Adverse Effects of COVID-19 Pandemic  
363 on Health Care Workers in North West Ethiopia: A Multicenter Cross-Sectional Study.  
364 *Neuropsychiatr Dis Treat*. 2021;17:1375-84. Epub 2021/05/18. doi: 10.2147/NDT.S306300.  
365 PubMed PMID: 33994787; PubMed Central PMCID: PMC78113010.
- 366 17. Sahebi A, Nejati-Zarnaqi B, Moayedi S, Yousefi K, Torres M, Golitaleb M. The prevalence  
367 of anxiety and depression among healthcare workers during the COVID-19 pandemic: An  
368 umbrella review of meta-analyses. *Prog Neuropsychopharmacol Biol Psychiatry*.  
369 2021;107:110247. Epub 2021/01/22. doi: 10.1016/j.pnpbp.2021.110247. PubMed PMID:  
370 33476692; PubMed Central PMCID: PMC7817526.
- 371 18. Elbay RY, Kurtulmuş A, Arpacioğlu S, Karadere E. Depression, anxiety, stress levels of  
372 physicians and associated factors in Covid-19 pandemics. *Psychiatry research*. 2020;290:113130.
- 373 19. Kroenke K, Spitzer RL, Williams JB. The PHQ-9: validity of a brief depression severity  
374 measure. *Journal of general internal medicine*. 2001;16(9):606-13. doi: 10.1046/j.1525-  
375 1497.2001.016009606.x. PubMed PMID: 11556941.

- 1  
2  
3 376 20. Kroenke K, Spitzer RL, Williams JB. The PHQ-9: validity of a brief depression severity  
4 377 measure. *Journal of general internal medicine*. 2001;16(9):606-13.
- 5 378 21. Kroenke K, Spitzer RL, Williams JB, Löwe B. The patient health questionnaire somatic,  
6 379 anxiety, and depressive symptom scales: a systematic review. *General hospital psychiatry*.  
7 380 2010;32(4):345-59.
- 8 381 22. Sawka KS, Mbewe C, Josephat D, Ngulube E. *The Senga of Zambia: Linguistic Survey*  
9 382 *Report with Recommendations for Literature Development Strategy*. SIL International: 2021.
- 10 383 23. Beres LK, Simbeza S, Holmes CB, Mwamba C, Mukamba N, Sharma A, et al. Human-  
11 384 centered design lessons for implementation science: improving the implementation of a patient-  
12 385 centered care intervention. *Journal of acquired immune deficiency syndromes (1999)*.  
13 386 2019;82(3):S230.
- 14 387 24. Mody A, Tram KH, Glidden DV, Eshun-Wilson I, Sikombe K, Mehrotra M, et al. Novel  
15 388 Longitudinal Methods for Assessing Retention in Care: a Synthetic Review. *Current HIV/AIDS*  
16 389 *Reports*. 2021;18(4):299-308.
- 17 390 25. Sikombe K, Mody A, Kadota J, Pry JJ, Simbeza S, Eshun-Wilson I, et al. Understanding  
18 391 patient transfers across multiple clinics in Zambia among HIV infected adults. *PloS one*.  
19 392 2020;15(11):e0241477.
- 20 393 26. Holmes CB, Sanne I. Changing models of care to improve progression through the HIV  
21 394 treatment cascade in different populations. *Current Opinion in HIV and AIDS*. 2015;10(6):447-  
22 395 50.
- 23 396 27. Holmes CB, Sikazwe I, Sikombe K, Eshun-Wilson I, Czaicki N, Beres LK, et al. Estimated  
24 397 mortality on HIV treatment among active patients and patients lost to follow-up in 4 provinces of  
25 398 Zambia: Findings from a multistage sampling-based survey. *PLoS Med*. 2018;15(1):e1002489.  
26 399 Epub 2018/01/13. doi: 10.1371/journal.pmed.1002489. PubMed PMID: 29329301; PubMed  
27 400 Central PMCID: PMC5766235.
- 28 401 28. Roy M, Czaicki N, Holmes C, Chavan S, Tsitsi A, Odeny T, et al. Understanding Sustained  
29 402 Retention in HIV/AIDS Care and Treatment: a Synthetic Review. *Current HIV/AIDS Reports*.  
30 403 2016:1-9.
- 31 404 29. Mwamba C, Sharma A, Mukamba N, Beres L, Geng E, Holmes CB, et al. 'They care  
32 405 rudely!': resourcing and relational health system factors that influence retention in care for people  
33 406 living with HIV in Zambia. *BMJ Glob Health*. 2018;3(5):e001007. Epub 2018/11/30. doi:  
34 407 10.1136/bmjgh-2018-001007. PubMed PMID: 30483408; PubMed Central PMCID:  
35 408 PMC6231098.
- 36 409 30. Li Y, Scherer N, Felix L, Kuper H. Prevalence of depression, anxiety and post-traumatic  
37 410 stress disorder in health care workers during the COVID-19 pandemic: A systematic review and  
38 411 meta-analysis. *PloS one*. 2021;16(3):e0246454.
- 39 412 31. Mulatu HA, Tesfaye M, Woldeyes E, Bayisa T, Fisseha H, Kassu RA. The prevalence of  
40 413 common mental disorders among healthcare professionals during the COVID-19 pandemic at a  
41 414 tertiary Hospital in Addis Ababa, Ethiopia. *Journal of Affective Disorders Reports*.  
42 415 2021;6:100246. doi: <https://doi.org/10.1016/j.jadr.2021.100246>.
- 43 416 32. Yadeta TA, Dessie Y, Balis B. Magnitude and Predictors of Health Care Workers  
44 417 Depression During the COVID-19 Pandemic: Health Facility-Based Study in Eastern Ethiopia.  
45 418 *Frontiers in Psychiatry*. 2021;12. doi: 10.3389/fpsy.2021.654430.
- 46 419 33. Fond G, Fernandes S, Lucas G, Greenberg N, Boyer L. Depression in healthcare workers:  
47 420 Results from the nationwide AMADEUS survey. *International journal of nursing studies*.  
48  
49  
50  
51  
52  
53  
54  
55  
56  
57  
58  
59  
60

- 2022;135:104328. Epub 2022/08/12. doi: 10.1016/j.ijnurstu.2022.104328. PubMed PMID: 35952535; PubMed Central PMCID: PMC9359895.
34. Mokhtari R, Moayedi S, Golitaleb M. COVID-19 pandemic and health anxiety among nurses of intensive care units. *International journal of mental health nursing*. 2020;29(6):1275.
35. Pfefferbaum B, North CS. Mental health and the Covid-19 pandemic. *New England Journal of Medicine*. 2020;383(6):510-2.
36. Yıldırım M, Çiçek İ. Optimism and pessimism mediate the association between parental coronavirus anxiety and depression among healthcare professionals in the era of COVID-19. *Psychology, health & medicine*. 2022;27(9):1898-906. Epub 2021/08/13. doi: 10.1080/13548506.2021.1966702. PubMed PMID: 34382894.
37. Saasa Y. *An Assessment on the Role of Human Rights and Governance in Health Service Delivery* 2019.
38. Kola L, Kohrt BA, Hanlon C, Naslund JA, Sikander S, Balaji M, et al. COVID-19 mental health impact and responses in low-income and middle-income countries: reimagining global mental health. *The Lancet Psychiatry*. 2021;8(6):535-50. doi: [https://doi.org/10.1016/S2215-0366\(21\)00025-0](https://doi.org/10.1016/S2215-0366(21)00025-0).
39. Abraham A, Chaabna K, Doraiswamy S, Bhagat S, Sheikh J, Mamtani R, et al. Depression among healthcare workers in the Eastern Mediterranean Region: a systematic review and meta-analysis. *Human resources for health*. 2021;19(1):1-18.
40. Wallén A, Eberhard S, Landgren K. The Experiences of Counsellors Offering Problem-Solving Therapy for Common Mental Health Issues at the Youth Friendship Bench in Zimbabwe. *Issues in Mental Health Nursing*. 2021;42(9):808-17. doi: 10.1080/01612840.2021.1879977.
41. Osei E, Mashamba-Thompson TP. Mobile health applications for disease screening and treatment support in low-and middle-income countries: A narrative review. *Heliyon*. 2021;7(3):e06639. Epub 2021/04/20. doi: 10.1016/j.heliyon.2021.e06639. PubMed PMID: 33869857; PubMed Central PMCID: PMC9359895.
42. Mutimushi PM, Mupenda BM, Manda PM, Nankonde N, Banda B, Mung'omba K, et al. ZICTA 2019 Annual Report. <https://www.zicta.zm/storage/posts/attachments/oiBT4oMnpJoN3dgHKpvByoDmNXq5ZDYtp3sxVYM3.pdf>; Zambia Information and Communications Technology Authority (ZICTA), 2019.
43. Chibanda D, Mesu P, Kajawu L, Cowan F, Araya R, Abas MA. Problem-solving therapy for depression and common mental disorders in Zimbabwe: piloting a task-shifting primary mental health care intervention in a population with a high prevalence of people living with HIV. *BMC public health*. 2011;11(1):1-10.
44. Patel V, Simon G, Chowdhary N, Kaaya S, Araya R. Packages of care for depression in low-and middle-income countries. *PLoS medicine*. 2009;6(10):e1000159.

## Supplement:

Figure S1: Histogram of total PHQ-9 scores among study participants

A

Page 19 of 22



B

BMJ Open

Facility size (categorically)

Small  
Medium  
Large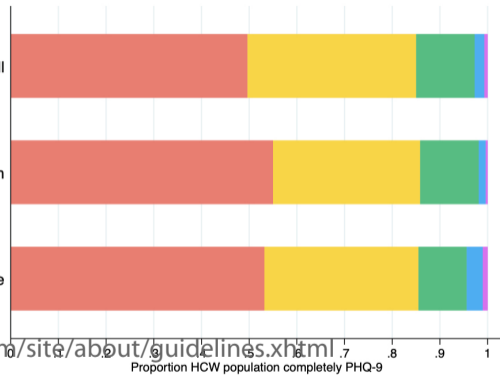

Minimal Mild Moderate Moderate-Severe Severe

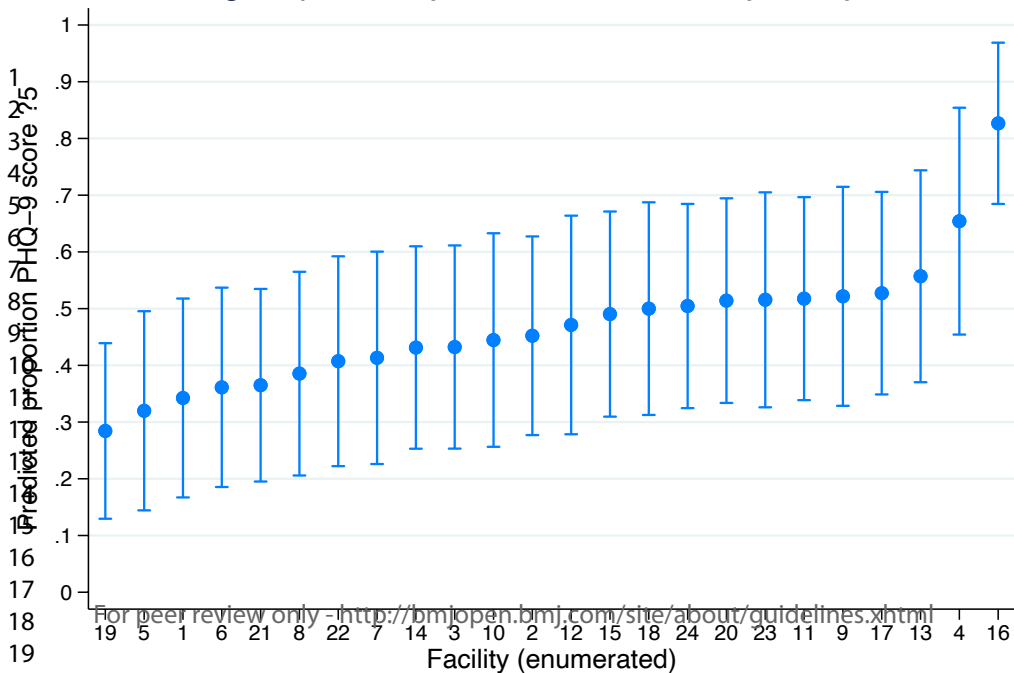



STROBE Statement—Checklist of items that should be included in reports of *cohort studies*

|                           | Item No | Recommendation                                                                                                                                                                                    | Page No |
|---------------------------|---------|---------------------------------------------------------------------------------------------------------------------------------------------------------------------------------------------------|---------|
| <b>Title and abstract</b> | 1       | (a) Indicate the study's design with a commonly used term in the title or the abstract                                                                                                            | 2       |
|                           |         | (b) Provide in the abstract an informative and balanced summary of what was done and what was found                                                                                               | 2       |
| <b>Introduction</b>       |         |                                                                                                                                                                                                   |         |
| Background/rationale      | 2       | Explain the scientific background and rationale for the investigation being reported                                                                                                              | 4       |
| Objectives                | 3       | State specific objectives, including any prespecified hypotheses                                                                                                                                  | 4, 5    |
| <b>Methods</b>            |         |                                                                                                                                                                                                   |         |
| Study design              | 4       | Present key elements of study design early in the paper                                                                                                                                           | 5       |
| Setting                   | 5       | Describe the setting, locations, and relevant dates, including periods of recruitment, exposure, follow-up, and data collection                                                                   | 5       |
| Participants              | 6       | (a) Give the eligibility criteria, and the sources and methods of selection of participants. Describe methods of follow-up                                                                        | 5, 6    |
|                           |         | (b) For matched studies, give matching criteria and number of exposed and unexposed                                                                                                               | NA      |
| Variables                 | 7       | Clearly define all outcomes, exposures, predictors, potential confounders, and effect modifiers. Give diagnostic criteria, if applicable                                                          | 5, 6    |
| Data sources/measurement  | 8*      | For each variable of interest, give sources of data and details of methods of assessment (measurement). Describe comparability of assessment methods if there is more than one group              | 5, 6    |
| Bias                      | 9       | Describe any efforts to address potential sources of bias                                                                                                                                         | 5, 6    |
| Study size                | 10      | Explain how the study size was arrived at                                                                                                                                                         | 5       |
| Quantitative variables    | 11      | Explain how quantitative variables were handled in the analyses. If applicable, describe which groupings were chosen and why                                                                      | 5, 6    |
| Statistical methods       | 12      | (a) Describe all statistical methods, including those used to control for confounding                                                                                                             | 6       |
|                           |         | (b) Describe any methods used to examine subgroups and interactions                                                                                                                               | 6       |
|                           |         | (c) Explain how missing data were addressed                                                                                                                                                       | 6       |
|                           |         | (d) If applicable, explain how loss to follow-up was addressed                                                                                                                                    | NA      |
|                           |         | (e) Describe any sensitivity analyses                                                                                                                                                             | 6       |
| <b>Results</b>            |         |                                                                                                                                                                                                   |         |
| Participants              | 13*     | (a) Report numbers of individuals at each stage of study—eg numbers potentially eligible, examined for eligibility, confirmed eligible, included in the study, completing follow-up, and analysed | 7, 8    |
|                           |         | (b) Give reasons for non-participation at each stage                                                                                                                                              | NA      |
|                           |         | (c) Consider use of a flow diagram                                                                                                                                                                | NA      |
| Descriptive data          | 14*     | (a) Give characteristics of study participants (eg demographic, clinical, social) and information on exposures and potential confounders                                                          | 7, 8    |
|                           |         | (b) Indicate number of participants with missing data for each variable of interest                                                                                                               | 7, 8    |
|                           |         | (c) Summarise follow-up time (eg, average and total amount)                                                                                                                                       | NA      |
| Outcome data              | 15*     | Report numbers of outcome events or summary measures over time                                                                                                                                    | 7, 8    |



|    |                          |    |                                                                                                                                                                                                              |        |
|----|--------------------------|----|--------------------------------------------------------------------------------------------------------------------------------------------------------------------------------------------------------------|--------|
| 1  | Main results             | 16 | (a) Give unadjusted estimates and, if applicable, confounder-adjusted estimates and their precision (eg, 95% confidence interval). Make clear which confounders were adjusted for and why they were included | 7, 8   |
| 2  |                          |    | (b) Report category boundaries when continuous variables were categorized                                                                                                                                    | 7, 8   |
| 3  |                          |    | (c) If relevant, consider translating estimates of relative risk into absolute risk for a meaningful time period                                                                                             | NA     |
| 4  |                          |    |                                                                                                                                                                                                              |        |
| 5  | Other analyses           | 17 | Report other analyses done—eg analyses of subgroups and interactions, and sensitivity analyses                                                                                                               | 9      |
| 6  |                          |    |                                                                                                                                                                                                              |        |
| 7  |                          |    |                                                                                                                                                                                                              |        |
| 8  |                          |    |                                                                                                                                                                                                              |        |
| 9  |                          |    |                                                                                                                                                                                                              |        |
| 10 |                          |    |                                                                                                                                                                                                              |        |
| 11 | <b>Discussion</b>        |    |                                                                                                                                                                                                              |        |
| 12 | Key results              | 18 | Summarise key results with reference to study objectives                                                                                                                                                     | 10     |
| 13 | Limitations              | 19 | Discuss limitations of the study, taking into account sources of potential bias or imprecision. Discuss both direction and magnitude of any potential bias                                                   | 11, 12 |
| 14 | Interpretation           | 20 | Give a cautious overall interpretation of results considering objectives, limitations, multiplicity of analyses, results from similar studies, and other relevant evidence                                   | 9, 10  |
| 15 | Generalisability         | 21 | Discuss the generalisability (external validity) of the study results                                                                                                                                        | 9, 10  |
| 16 |                          |    |                                                                                                                                                                                                              |        |
| 17 | <b>Other information</b> |    |                                                                                                                                                                                                              |        |
| 18 | Funding                  | 22 | Give the source of funding and the role of the funders for the present study and, if applicable, for the original study on which the present article is based                                                | 13, 14 |
| 19 |                          |    |                                                                                                                                                                                                              |        |
| 20 |                          |    |                                                                                                                                                                                                              |        |
| 21 |                          |    |                                                                                                                                                                                                              |        |
| 22 |                          |    |                                                                                                                                                                                                              |        |
| 23 |                          |    |                                                                                                                                                                                                              |        |
| 24 |                          |    |                                                                                                                                                                                                              |        |
| 25 |                          |    |                                                                                                                                                                                                              |        |
| 26 |                          |    |                                                                                                                                                                                                              |        |
| 27 |                          |    |                                                                                                                                                                                                              |        |
| 28 |                          |    |                                                                                                                                                                                                              |        |
| 29 |                          |    |                                                                                                                                                                                                              |        |
| 30 |                          |    |                                                                                                                                                                                                              |        |
| 31 |                          |    |                                                                                                                                                                                                              |        |
| 32 |                          |    |                                                                                                                                                                                                              |        |
| 33 |                          |    |                                                                                                                                                                                                              |        |
| 34 |                          |    |                                                                                                                                                                                                              |        |
| 35 |                          |    |                                                                                                                                                                                                              |        |
| 36 |                          |    |                                                                                                                                                                                                              |        |
| 37 |                          |    |                                                                                                                                                                                                              |        |
| 38 |                          |    |                                                                                                                                                                                                              |        |
| 39 |                          |    |                                                                                                                                                                                                              |        |
| 40 |                          |    |                                                                                                                                                                                                              |        |
| 41 |                          |    |                                                                                                                                                                                                              |        |
| 42 |                          |    |                                                                                                                                                                                                              |        |
| 43 |                          |    |                                                                                                                                                                                                              |        |
| 44 |                          |    |                                                                                                                                                                                                              |        |
| 45 |                          |    |                                                                                                                                                                                                              |        |
| 46 |                          |    |                                                                                                                                                                                                              |        |
| 47 |                          |    |                                                                                                                                                                                                              |        |
| 48 |                          |    |                                                                                                                                                                                                              |        |
| 49 |                          |    |                                                                                                                                                                                                              |        |
| 50 |                          |    |                                                                                                                                                                                                              |        |
| 51 |                          |    |                                                                                                                                                                                                              |        |
| 52 |                          |    |                                                                                                                                                                                                              |        |
| 53 |                          |    |                                                                                                                                                                                                              |        |
| 54 |                          |    |                                                                                                                                                                                                              |        |
| 55 |                          |    |                                                                                                                                                                                                              |        |
| 56 |                          |    |                                                                                                                                                                                                              |        |
| 57 |                          |    |                                                                                                                                                                                                              |        |
| 58 |                          |    |                                                                                                                                                                                                              |        |
| 59 |                          |    |                                                                                                                                                                                                              |        |
| 60 |                          |    |                                                                                                                                                                                                              |        |

\*Give information separately for exposed and unexposed groups.

**Note:** An Explanation and Elaboration article discusses each checklist item and gives methodological background and published examples of transparent reporting. The STROBE checklist is best used in conjunction with this article (freely available on the Web sites of PLoS Medicine at <http://www.plosmedicine.org/>, Annals of Internal Medicine at <http://www.annals.org/>, and Epidemiology at <http://www.epidem.com/>). Information on the STROBE Initiative is available at <http://www.strobe-statement.org>.
