# Supplementary material for: Cross-sectional study to assess depression among healthcare workers in Lusaka, Zambia during the COVID-19 pandemic
Source: PubMed Central journal article supplement (PMC10083529; doi:10.1136/bmjopen-2022-069257), 2023-04-05

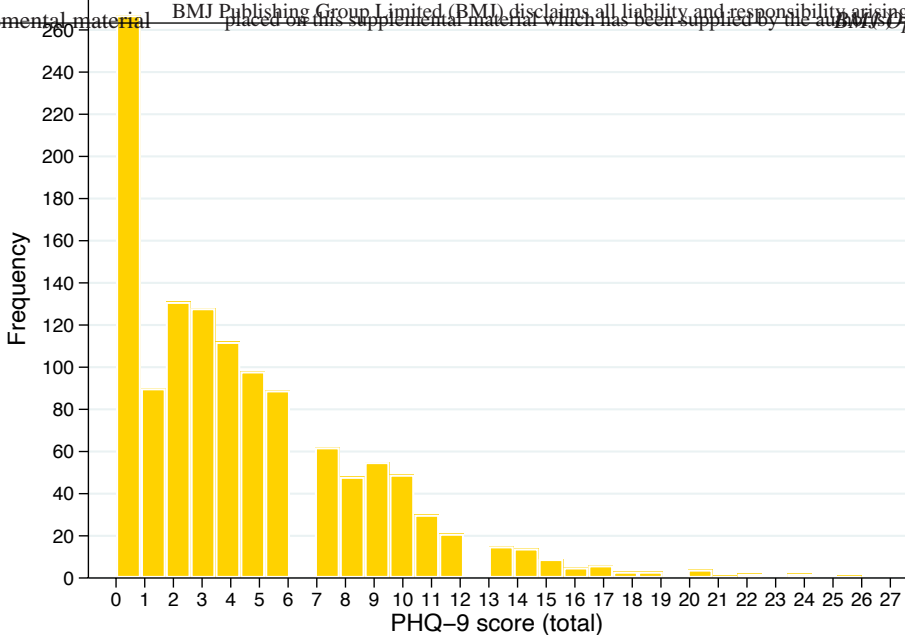

Supplement: bmjopen-2022-069257supp001.pdf [file bmjopen-2022-069257supp001.pdf]
